# Supplementary material for: Genomic mapping in outbred mice reveals overlap in genetic susceptibility for HZE ion– and γ-ray–induced tumors
Source: PubMed Central journal article supplement — Sci Adv. 2020 Apr 15;6(16):eaax5940. doi: 10.1126/sciadv.aax5940 (PMC7159905; doi:10.1126/sciadv.aax5940), 2020-04-15
Supplement: aax5940_SM.pdf [file aax5940_SM.pdf]

## Supplementary Materials for

### **Genomic mapping in outbred mice reveals overlap in genetic susceptibility for HZE ion- and $\gamma$ -ray-induced tumors**

E. F. Edmondson\*, D. M. Gatti, F. A. Ray, E. L. Garcia, C. M. Fallgren, D. A. Kamstock, M. M. Weil\*

\*Corresponding author. Email: michael.weil@colostate.edu (M.M.W.); elijah.edmondson@nih.gov (E.F.E.)

Published 15 April 2020, *Sci. Adv.* **6**, eaax5940 (2020)  
DOI: 10.1126/sciadv.aax5940

#### **This PDF file includes:**

Tables S1 to S3  
Figs. S1 to S22

**Table S1.** Tumor histotypes and incidence for HS/Npt mice exposed by radiation exposure group.

|                               | <u>Total</u><br>♂ = 934<br>♀ = 916<br>n = 1850 | <u>HZE</u><br>♂ = 312<br>♀ = 310<br>n = 622 | <u>γ</u><br>♂ = 313<br>♀ = 302<br>n = 615 | <u>Unirradiated</u><br>♂ = 309<br>♀ = 304<br>n = 613 | <u>HZE Fe</u><br>♂ = 161<br>♀ = 153<br>n = 314 | <u>HZE Si</u><br>♂ = 151<br>♀ = 157<br>n = 308 | M:F     |
|-------------------------------|------------------------------------------------|---------------------------------------------|-------------------------------------------|------------------------------------------------------|------------------------------------------------|------------------------------------------------|---------|
| <b>Epithelial</b>             |                                                |                                             |                                           |                                                      |                                                |                                                |         |
| Thyroid                       |                                                |                                             |                                           |                                                      |                                                |                                                |         |
| Follicular Adenoma            | 43                                             | 21                                          | 13                                        | 9                                                    | 12                                             | 9                                              | 21:22   |
| Follicular Carcinoma          | 5                                              | 2                                           | 2                                         | 1                                                    | 2                                              | 0                                              | 2:3     |
| Parathyroid Adenoma           | 2                                              | 0                                           | 2                                         | 0                                                    | 0                                              | 0                                              | 1:1     |
| Ovary                         |                                                |                                             |                                           |                                                      |                                                |                                                |         |
| Granulosa Cell Tumor          | 45                                             | 3                                           | 42                                        | 0                                                    | 3                                              | 0                                              | 0:45    |
| Tubulostromal Adenoma         | 15                                             | 0                                           | 15                                        | 0                                                    | 0                                              | 0                                              | 0:13    |
| Tubulostromal Adenocarcinoma  | 2                                              | 0                                           | 2                                         | 0                                                    | 0                                              | 0                                              | 0:2     |
| Ovarian Carcinoma             | 2                                              | 0                                           | 0                                         | 2                                                    | 0                                              | 0                                              | 0:2     |
| Luteoma                       | 2                                              | 1                                           | 1                                         | 0                                                    | 0                                              | 1                                              | 0:2     |
| Thecoma                       | 1                                              | 1                                           | 0                                         | 0                                                    | 0                                              | 1                                              | 0:1     |
| Ovarian Cystadenoma           | 1                                              | 0                                           | 1                                         | 0                                                    | 0                                              | 0                                              | 0:1     |
| Dysgerminoma                  | 1                                              | 1                                           | 0                                         | 0                                                    | 1                                              | 0                                              | 0:1     |
| Uterus                        |                                                |                                             |                                           |                                                      |                                                |                                                |         |
| Uterine Stromal Sarcoma       | 6                                              | 3                                           | 3                                         | 0                                                    | 1                                              | 2                                              | 0:6     |
| Endometrial Papillary Adenoma | 1                                              | 0                                           | 0                                         | 1                                                    | 0                                              | 0                                              | 0:1     |
| Endometrial Stromal Polyp     | 16                                             | 12                                          | 2                                         | 2                                                    | 4                                              | 8                                              | 0:16    |
| Mammary Gland                 |                                                |                                             |                                           |                                                      |                                                |                                                |         |
| Adenocarcinoma                | 28                                             | 11                                          | 12                                        | 5                                                    | 3                                              | 8                                              | 2:26    |
| Adenoacanthoma                | 4                                              | 1                                           | 0                                         | 3                                                    | 0                                              | 1                                              | 0:4     |
| Carcinosarcoma                | 1                                              | 0                                           | 1                                         | 0                                                    | 0                                              | 0                                              | 0:1     |
| Pulmonary                     |                                                |                                             |                                           |                                                      |                                                |                                                |         |
| Pulmonary Adenoma             | 228                                            | 60                                          | 88                                        | 80                                                   | 34                                             | 26                                             | 151:77  |
| Pulmonary Adenocarcinoma      | 353                                            | 128                                         | 110                                       | 115                                                  | 64                                             | 64                                             | 243:110 |
| Hepatic                       |                                                |                                             |                                           |                                                      |                                                |                                                |         |
| Hepatocellular Adenoma        | 314                                            | 126                                         | 94                                        | 94                                                   | 68                                             | 58                                             | 218:96  |
| Hepatocellular Carcinoma      | 251                                            | 100                                         | 66                                        | 85                                                   | 57                                             | 43                                             | 187:64  |
| Hepatoblastoma                | 6                                              | 1                                           | 4                                         | 1                                                    | 0                                              | 1                                              | 5:1     |
| Biliary Cystadenoma           | 9                                              | 5                                           | 4                                         | 0                                                    | 2                                              | 3                                              | 9:0     |
| Cholangiocellular Carcinoma   | 2                                              | 0                                           | 1                                         | 1                                                    | 0                                              | 1                                              | 2:0     |
| Harderian Gland               |                                                |                                             |                                           |                                                      |                                                |                                                |         |
| Adenoma                       | 219                                            | 121                                         | 77                                        | 21                                                   | 67                                             | 54                                             | 124:95  |
| Adenocarcinoma                | 41                                             | 20                                          | 17                                        | 4                                                    | 10                                             | 10                                             | 20:21   |
| Unilateral Neoplasm           | 209                                            | 109                                         | 80                                        | 20                                                   | 57                                             | 52                                             | 117:92  |
| Bilateral Neoplasms           | 51                                             | 32                                          | 14                                        | 5                                                    | 20                                             | 12                                             | 27:24   |
| Gastrointestinal Tract        |                                                |                                             |                                           |                                                      |                                                |                                                |         |
| Adenocarcinoma                | 3                                              | 1                                           | 1                                         | 1                                                    | 0                                              | 1                                              | 0:3     |
| Gastric SCC                   | 2                                              | 2                                           | 0                                         | 0                                                    | 1                                              | 1                                              | 1:1     |
| Duodenal Polyp                | 12                                             | 8                                           | 3                                         | 1                                                    | 6                                              | 2                                              | 8:4     |
| Colonic Polyp                 | 1                                              | 0                                           | 1                                         | 0                                                    | 0                                              | 0                                              | 1:0     |
| Gastric Adenocarcinoma        | 1                                              | 0                                           | 0                                         | 1                                                    | 0                                              | 0                                              | 1:0     |

|                                                | <b>Total</b><br>♂ = 934<br>♀ = 916<br>n = 1850 | <b>HZE</b><br>♂ = 312<br>♀ = 310<br>n = 622 | <b>γ</b><br>♂ = 313<br>♀ = 302<br>n = 615 | <b>Unirradiated</b><br>♂ = 309<br>♀ = 304<br>n = 613 | <b>HZE Fe</b><br>♂ = 161<br>♀ = 153<br>n = 314 | <b>HZE Si</b><br>♂ = 151<br>♀ = 157<br>n = 308 | M:F     |
|------------------------------------------------|------------------------------------------------|---------------------------------------------|-------------------------------------------|------------------------------------------------------|------------------------------------------------|------------------------------------------------|---------|
| Gastric Polyp                                  | 1                                              | 0                                           | 1                                         | 0                                                    | 0                                              | 0                                              | 0:1     |
| <b>Other</b>                                   |                                                |                                             |                                           |                                                      |                                                |                                                |         |
| Salivary Gland Carcinoma                       | 1                                              | 0                                           | 1                                         | 0                                                    | 0                                              | 0                                              | 1:0     |
| Squamous Cell Carcinoma (lingual or laryngeal) | 3                                              | 1                                           | 1                                         | 1                                                    | 1                                              | 0                                              | 1:2     |
| Squamous Cell Carcinoma (haired skin)          | 3                                              | 1                                           | 2                                         | 0                                                    | 1                                              | 0                                              | 3:0     |
| Adrenocortical Carcinoma                       | 3                                              | 3                                           | 0                                         | 0                                                    | 2                                              | 1                                              | 2:1     |
| Pheochromocytoma                               | 3                                              | 3                                           | 0                                         | 0                                                    | 2                                              | 1                                              | 0:3     |
| Renal Cell Carcinoma                           | 3                                              | 1                                           | 1                                         | 1                                                    | 0                                              | 1                                              | 3:0     |
| Renal Adenoma                                  | 1                                              | 0                                           | 1                                         | 0                                                    | 0                                              | 0                                              | 1:0     |
| Islet Cell Carcinoma                           | 2                                              | 2                                           | 0                                         | 0                                                    | 1                                              | 1                                              | 1:1     |
| Odontogenic Tumor                              | 2                                              | 1                                           | 1                                         | 0                                                    | 1                                              | 0                                              | 0:2     |
| Mesothelioma                                   | 2                                              | 1                                           | 1                                         | 0                                                    | 0                                              | 1                                              | 0:2     |
| Pilomatricoma                                  | 1                                              | 0                                           | 1                                         | 0                                                    | 0                                              | 0                                              | 1:0     |
| Papillary Adenoma (gall bladder)               | 1                                              | 0                                           | 0                                         | 1                                                    | 0                                              | 0                                              | 1:0     |
| Sebaceous adenoma (skin)                       | 2                                              | 1                                           | 1                                         | 0                                                    | 0                                              | 1                                              | 2:0     |
| Basal Cell Carcinoma (skin)                    | 3                                              | 1                                           | 1                                         | 0                                                    | 1                                              | 0                                              | 2:1     |
| <b>Nervous</b>                                 |                                                |                                             |                                           |                                                      |                                                |                                                |         |
| Pituitary Adenoma                              | 40                                             | 15                                          | 22                                        | 3                                                    | 10                                             | 5                                              | 9:31    |
| Pituitary Adenocarcinoma                       | 1                                              | 1                                           | 0                                         | 0                                                    | 1                                              | 0                                              | 1:0     |
| Meningioma                                     | 2                                              | 0                                           | 1                                         | 1                                                    | 0                                              | 0                                              | 1:1     |
| Astrocytoma                                    | 1                                              | 1                                           | 0                                         | 0                                                    | 1                                              | 0                                              | 1:0     |
| Choroid Plexus Tumor                           | 3                                              | 1                                           | 2                                         | 0                                                    | 1                                              | 0                                              | 0:3     |
| Glial Tumor, Olfactory Lobe                    | 1                                              | 0                                           | 1                                         | 0                                                    | 0                                              | 0                                              | 1:0     |
| Ependymoma                                     | 2                                              | 1                                           | 1                                         | 0                                                    | 1                                              | 0                                              | 0:2     |
| <b>Mesenchymal</b>                             |                                                |                                             |                                           |                                                      |                                                |                                                |         |
| <b>Hematopoietic System</b>                    |                                                |                                             |                                           |                                                      |                                                |                                                |         |
| Lymphoid                                       | 570                                            | 172                                         | 195                                       | 203                                                  | 84                                             | 88                                             | 274:307 |
| Follicular B cell                              | 209                                            | 66                                          | 59                                        | 84                                                   | 34                                             | 32                                             | 101:108 |
| Diffuse Large B cell                           | 120                                            | 39                                          | 38                                        | 43                                                   | 20                                             | 19                                             | 56:64   |
| Lymphoblastic B cell                           | 81                                             | 24                                          | 16                                        | 41                                                   | 12                                             | 12                                             | 38:43   |
| Histiocyte Associated B cell                   | 13                                             | 3                                           | 3                                         | 7                                                    | 1                                              | 2                                              | 3:10    |
| Anaplastic Plasmacytoma                        | 4                                              | 1                                           | 2                                         | 1                                                    | 0                                              | 1                                              | 2:2     |
| Small B cell                                   | 13                                             | 6                                           | 4                                         | 3                                                    | 2                                              | 4                                              | 6:7     |
| Marginal Zone B cell                           | 5                                              | 3                                           | 1                                         | 1                                                    | 2                                              | 1                                              | 3:2     |
| Precursor T cell                               | 82                                             | 13                                          | 61                                        | 8                                                    | 6                                              | 7                                              | 40:42   |
| Small T cell                                   | 5                                              | 2                                           | 1                                         | 2                                                    | 2                                              | 0                                              | 1:4     |
| Anaplastic T cell                              | 9                                              | 4                                           | 5                                         | 0                                                    | 0                                              | 4                                              | 3:6     |
| Other                                          | 29                                             | 11                                          | 5                                         | 13                                                   | 5                                              | 6                                              | 14:15   |
| Myeloid leukemia                               | 124                                            | 18                                          | 96                                        | 10                                                   | 5                                              | 13                                             | 86:38   |
| Histiocytic Sarcoma                            | 37                                             | 12                                          | 11                                        | 14                                                   | 4                                              | 8                                              | 21:16   |
| Osteosarcoma                                   | 19                                             | 12                                          | 6                                         | 1                                                    | 8                                              | 4                                              | 4:14    |
| Osteoma                                        | 7                                              | 1                                           | 3                                         | 3                                                    | 1                                              | 0                                              | 2:6     |

|                     | <b>Total</b><br>♂ = 934<br>♀ = 916<br>n = 1850 | <b>HZE</b><br>♂ = 312<br>♀ = 310<br>n = 622 | <b>γ</b><br>♂ = 313<br>♀ = 302<br>n = 615 | <b>Unirradiated</b><br>♂ = 309<br>♀ = 304<br>n = 613 | <b>HZE Fe</b><br>♂ = 161<br>♀ = 153<br>n = 314 | <b>HZE Si</b><br>♂ = 151<br>♀ = 157<br>n = 308 | M:F   |
|---------------------|------------------------------------------------|---------------------------------------------|-------------------------------------------|------------------------------------------------------|------------------------------------------------|------------------------------------------------|-------|
| Soft Tissue Sarcoma |                                                |                                             |                                           |                                                      |                                                |                                                |       |
| Rhabdomyosarcoma    | 14                                             | 4                                           | 4                                         | 6                                                    | 2                                              | 2                                              | 4:10  |
| Fibrosarcoma        | 4                                              | 2                                           | 1                                         | 1                                                    | 2                                              | 0                                              | 3:1   |
| Hemangiosarcoma     | 76                                             | 32                                          | 18                                        | 26                                                   | 16                                             | 16                                             | 42:34 |
| Hemangioma          | 22                                             | 14                                          | 4                                         | 4                                                    | 7                                              | 7                                              | 31:9  |
| Undifferentiated    | 29                                             | 14                                          | 4                                         | 11                                                   | 5                                              | 9                                              | 5:24  |
| Myxosarcoma         | 6                                              | 1                                           | 2                                         | 3                                                    | 0                                              | 1                                              | 0:6   |
| Myxoma              | 1                                              | 0                                           | 0                                         | 1                                                    | 0                                              | 0                                              | 0:1   |
| Leiomyosarcoma      | 11                                             | 6                                           | 2                                         | 3                                                    | 3                                              | 3                                              | 3:8   |
| Leiomyoma           | 1                                              | 1                                           | 0                                         | 0                                                    | 0                                              | 1                                              | 0:1   |
| Nerve Sheath Tumor  | 1                                              | 1                                           | 0                                         | 0                                                    | 1                                              | 0                                              | 1:0   |
| GIST                | 4                                              | 2                                           | 1                                         | 1                                                    | 1                                              | 1                                              | 3:1   |
| Liposarcoma         | 1                                              | 1                                           | 0                                         | 0                                                    | 0                                              | 1                                              | 1:0   |

**Table S2.** Genome wide association mapping loci for tumor incidence in HS/Npt mice.

| Phenotype                | Group          | Chr | Max LOD | QTL         | QTL 95% Confidence Interval |                |                          | Percent Variance Explained (T <sub>jur</sub> ) | Model                         | Covariates |
|--------------------------|----------------|-----|---------|-------------|-----------------------------|----------------|--------------------------|------------------------------------------------|-------------------------------|------------|
|                          |                |     |         |             | Position (BP)               |                | Confidence Interval (Mb) |                                                |                               |            |
| B-cell Lymphoma          | All mice       | 1   | 10.999  | 73732062.5  | 73494384                    | 74262978.7     | 0.77                     | 2.48                                           | glm(binomial, link = "logit") | Sex        |
| BLL Lymphoma             | All mice       | 1   | 6.420   | 74343073    | 73443080                    | 78299617       | 4.86                     | 1.28                                           | glm(binomial, link = "logit") | Sex        |
| Thyroid adenoma          | All mice       | 1   | 6.079   | 73078474    | 71335224                    | 74931530       | 3.60                     | 2.35                                           | glm(binomial, link = "logit") | Sex        |
| B-cell Lymphoma          | Unirradiated   | 1   | 6.318   | 74938971    | 73640888.9625               | 77001094.4125  | 3.36                     | 4.02                                           | glm(binomial, link = "logit") | Sex        |
| Thyroid adenoma          | All Irradiated | 2   | 10.836  | 122584526   | 120236421                   | 124006948      | 3.77                     | 4.11                                           | glm(binomial, link = "logit") | Sex        |
| AML                      | All Irradiated | 2   | 6.995   | 147914389   | 147828068.8375              | 148316130      | 0.49                     | 5.82                                           | glm(binomial, link = "logit") | Sex        |
| Hepatocellular Carcinoma | All Irradiated | 2   | 6.386   | 123223410   | 119805949                   | 124476777.9625 | 4.67                     | 5.65                                           | glm(binomial, link = "logit") | Sex        |
| Thyroid adenoma          | All mice       | 2   | 11.204  | 121483195   | 120236421                   | 124006948      | 3.77                     | 3.14                                           | glm(binomial, link = "logit") | Sex        |
| B-cell Lymphoma          | All mice       | 2   | 8.300   | 155646718   | 151758335.85                | 159294061.825  | 7.54                     | 2.06                                           | glm(binomial, link = "logit") | Sex        |
| Hepatocellular Carcinoma | All mice       | 2   | 6.291   | 117964768   | 115943082.975               | 120564786      | 4.62                     | 5.37                                           | glm(binomial, link = "logit") | Sex        |
| Thyroid adenoma          | HZE            | 2   | 7.803   | 123357336.5 | 120345725                   | 124006948      | 3.66                     | 7.00                                           | glm(binomial, link = "logit") | Sex        |
| B-cell Lymphoma          | Unirradiated   | 2   | 6.495   | 152492554   | 152492554                   | 155646718      | 3.15                     | 4.26                                           | glm(binomial, link = "logit") | Sex        |
| PreT Lymphoma            | All mice       | 3   | 6.095   | 29822410    | 28532178.6                  | 33271823.8375  | 4.74                     | 0.75                                           | glm(binomial, link = "logit") | Sex        |
| B-cell Lymphoma          | Unirradiated   | 3   | 7.436   | 33476536    | 32159146                    | 33781730.45    | 1.62                     | 5.47                                           | glm(binomial, link = "logit") | Sex        |
| PreT Lymphoma            | All Irradiated | 4   | 7.085   | 82878119    | 82243458                    | 86141326       | 3.90                     | 3.20                                           | glm(binomial, link = "logit") | Sex        |
| PreT Lymphoma            | All mice       | 4   | 6.814   | 82878119    | 82098201                    | 85953208.2125  | 3.86                     | 2.10                                           | glm(binomial, link = "logit") | Sex        |
| PreT Lymphoma            | Gamma          | 4   | 8.413   | 89196864    | 85649528                    | 90387054.5     | 4.74                     | 7.46                                           | glm(binomial, link = "logit") | Sex        |
| PreT Lymphoma            | Gamma          | 4   | 8.413   | 96173703    | 96168780                    | 98871254       | 2.70                     | 7.46                                           | glm(binomial, link = "logit") | Sex        |
| PreT Lymphoma            | Gamma          | 4   | 8.131   | 82622922    | 82622922                    | 85884363.4     | 3.26                     | 7.46                                           | glm(binomial, link = "logit") | Sex        |
| BLL Lymphoma             | All Irradiated | 5   | 6.848   | 107760474   | 106744777.375               | 107900411      | 1.16                     | 1.65                                           | glm(binomial, link = "logit") | Sex        |
| Thyroid adenoma          | All Irradiated | 5   | 5.850   | 142141592   | 142141592                   | 144401281.675  | 2.26                     | 1.80                                           | glm(binomial, link = "logit") | Sex        |
| B-cell Lymphoma          | All mice       | 5   | 6.020   | 107350502   | 105230836.5                 | 108062273.5625 | 2.83                     | 1.45                                           | glm(binomial, link = "logit") | Sex        |
| Thyroid adenoma          | All mice       | 5   | 5.986   | 142141592   | 142050181                   | 144399143      | 2.35                     | 1.25                                           | glm(binomial, link = "logit") | Sex        |
| B-cell Lymphoma          | Unirradiated   | 5   | 5.848   | 7075383     | 5683053                     | 8167587.775    | 2.48                     | 3.97                                           | glm(binomial, link = "logit") | Sex        |
| BLL Lymphoma             | All Irradiated | 6   | 6.428   | 116924770   | 115490532.1                 | 120212740      | 4.72                     | 1.98                                           | glm(binomial, link = "logit") | Sex        |
| Pulmonary adenocarcinoma | All Irradiated | 6   | 6.050   | 148261935   | 146889257.5                 | 149577033      | 2.69                     | 4.84                                           | glm(binomial, link = "logit") | Sex        |
| Amyloidosis              | All mice       | 6   | 5.780   | 136702296   | 134007207                   | 136963345      | 2.96                     | 2.48                                           | glm(binomial, link = "logit") | Sex        |
| B-cell Lymphoma          | All mice       | 8   | 6.665   | 72479016.5  | 70639782.6                  | 74664266       | 4.02                     | 1.63                                           | glm(binomial, link = "logit") | Sex        |
| Hepatocellular Carcinoma | All mice       | 8   | 6.546   | 30794428    | 29984337.3                  | 33252747.4     | 3.27                     | 5.28                                           | glm(binomial, link = "logit") | Sex        |
| Amyloidosis              | All Irradiated | 9   | 6.162   | 35893111    | 33739192.1875               | 36832676       | 3.09                     | 3.96                                           | glm(binomial, link = "logit") | Sex        |
| B-cell Lymphoma          | All mice       | 9   | 7.860   | 62452601.5  | 61606150.875                | 62993849.175   | 1.39                     | 1.90                                           | glm(binomial, link = "logit") | Sex        |
| FBL Lymphoma             | All mice       | 9   | 6.581   | 122891663   | 122867671.575               | 122891663      | 0.02                     | 0.84                                           | glm(binomial, link = "logit") | Sex        |
| Thyroid adenoma          | All mice       | 9   | 5.801   | 3455888     | 3455888                     | 4254190.5      | 0.80                     | 1.55                                           | glm(binomial, link = "logit") | Sex        |
| Harderian adenocarcinoma | HZE            | 9   | 6.018   | 102809143   | 101334669.45                | 105635973      | 4.30                     | 2.78                                           | glm(binomial, link = "logit") | Sex        |
| B-cell Lymphoma          | Unirradiated   | 9   | 6.903   | 75346491    | 74206387.6375               | 77507836       | 3.30                     | 4.82                                           | glm(binomial, link = "logit") | Sex        |
| Thyroid adenoma          | HZE            | 10  | 5.777   | 47711287.5  | 46090331.85                 | 50595803       | 4.51                     | 5.22                                           | glm(binomial, link = "logit") | Sex        |
| Mammary adenocarcinoma   | All Irradiated | 11  | 6.175   | 111549311   | 110639949.5                 | 113855208      | 3.22                     | 4.55                                           | glm(binomial, link = "logit") | Sex        |
| B-cell Lymphoma          | Gamma          | 11  | 6.286   | 88759037    | 86219553                    | 90177534       | 3.96                     | 6.22                                           | glm(binomial, link = "logit") | Sex        |
| Pulmonary adenocarcinoma | All mice       | 14  | 6.249   | 97084001    | 94070480                    | 99894015.5375  | 5.82                     | 4.84                                           | glm(binomial, link = "logit") | Sex        |
| B-cell Lymphoma          | All mice       | 15  | 7.901   | 98143056    | 95982213.7                  | 98755939       | 2.77                     | 1.93                                           | glm(binomial, link = "logit") | Sex        |
| AML                      | All mice       | 15  | 6.312   | 91425908    | 88406017.6                  | 94424358.6     | 6.02                     | 2.98                                           | glm(binomial, link = "logit") | Sex        |
| Hepatocellular Carcinoma | All mice       | 15  | 6.146   | 94246099    | 90919680.8875               | 97184622       | 6.26                     | 5.31                                           | glm(binomial, link = "logit") | Sex        |
| B-cell Lymphoma          | Unirradiated   | 15  | 6.814   | 98556922    | 95073624.6                  | 98745723.575   | 3.67                     | 4.84                                           | glm(binomial, link = "logit") | Sex        |
| Osteosarcoma             | All Irradiated | 17  | 5.962   | 71019344    | 69377022                    | 71474706       | 2.10                     | 2.49                                           | glm(binomial, link = "logit") | Sex        |
| FBL Lymphoma             | All Irradiated | 17  | 5.805   | 86662315    | 85568114.525                | 88783444       | 3.22                     | 2.59                                           | glm(binomial, link = "logit") | Sex        |
| Osteosarcoma             | All mice       | 17  | 6.013   | 70394500    | 69377022                    | 71474706       | 2.10                     | 1.68                                           | glm(binomial, link = "logit") | Sex        |
| DLBCL Lymphoma           | Gamma          | 17  | 6.744   | 83589501    | 83534674                    | 85336592       | 1.80                     | 5.76                                           | glm(binomial, link = "logit") | Sex        |
| PreT Lymphoma            | Gamma          | 17  | 6.154   | 48674981    | 48649945                    | 53188104.5     | 4.54                     | 5.01                                           | glm(binomial, link = "logit") | Sex        |
| Harderian adenoma        | HZE            | 17  | 5.976   | 45427448    | 44081080.2125               | 45661990.15    | 1.58                     | 4.43                                           | glm(binomial, link = "logit") | Sex        |
| DLBCL Lymphoma           | Gamma          | 18  | 6.530   | 82809869    | 80244031.5                  | 86347428.35    | 6.10                     | 4.76                                           | glm(binomial, link = "logit") | Sex        |

**Table S3.** Genome wide association mapping loci for tumor latency in HS/Npt mice.

| Phenotype                | Group          | Chr | Max LOD | QTL (BP)    | QTL 95% Confidence Interval |                | Percent Variance Explained | Hazard for BB compared to AA Genotype |              |                |          | R <sup>2</sup> | Model | Covariates           |     |
|--------------------------|----------------|-----|---------|-------------|-----------------------------|----------------|----------------------------|---------------------------------------|--------------|----------------|----------|----------------|-------|----------------------|-----|
|                          |                |     |         |             | Position (BP)               | Size (Mb)      |                            | Hazard                                | Hazard Ratio | Standard Error | Pre-β    |                |       |                      |     |
| B-cell Lymphoma          | All irradiated | 1   | 6.193   | 73675331    | 73644645.5                  | 76156729       | 2.51                       | 2.339                                 | -0.793       | 0.453          | 0.340    | 0.020          | 0.023 | cox(surv + addcovar) | Sex |
| B-cell Lymphoma          | All mice       | 1   | 11.885  | 73712062.5  | 73644645.5                  | 75727460.5     | 1.88                       | 2.911                                 | -1.004       | 0.366          | 0.293    | 0.001          | 0.029 | cox(surv + addcovar) | Sex |
| BLL Lymphoma             | All mice       | 1   | 7.036   | 74343073    | 73443080                    | 78275804.0875  | 4.83                       | 1.286                                 | 2.625        | 13.807         | 1.009    | 0.009          | 0.013 | cox(surv + addcovar) | Sex |
| B-cell Lymphoma          | Gamma          | 1   | 5.940   | 154533061   | 154053089.1375              | 157068396      | 3.02                       | 3.821                                 | 1.277        | 3.588          | 0.279    | 0.000          | 0.038 | cox(surv + addcovar) | Sex |
| B-cell Lymphoma          | Unirradiated   | 1   | 7.512   | 73671405.5  | 73494384                    | 76186572.5     | 2.69                       | 5.113                                 | -1.229       | 0.292          | 0.272    | 0.000          | 0.051 | cox(surv + addcovar) | Sex |
| AML                      | All irradiated | 2   | 6.547   | 148081727   | 147808999                   | 148316130      | 0.51                       | 2.289                                 | 3.553        | 34.904         | 0.728    | 0.000          | 0.023 | cox(surv + addcovar) | Sex |
| B-cell Lymphoma          | All irradiated | 2   | 6.216   | 119093112   | 116762788                   | 122163058      | 5.40                       | 1.580                                 | -1.350       | 0.259          | 0.710    | 0.057          | 0.016 | cox(surv + addcovar) | Sex |
| Hepatocellular Carcinoma | All irradiated | 2   | 5.991   | 123096335   | 120896801                   | 125882132.925  | 4.79                       | 1.719                                 | -0.841       | 0.431          | 0.456    | 0.065          | 0.017 | cox(surv + addcovar) | Sex |
| Thyroid adenoma          | All irradiated | 2   | 7.574   | 122584526   | 120235551.9875              | 124069948      | 3.77                       | NA                                    | NA           | NA             | NA       | NA             | NA    | cox(surv + addcovar) | Sex |
| B-cell Lymphoma          | All mice       | 2   | 8.309   | 155646718   | 1511688481                  | 159364801.15   | 7.68                       | 1.877                                 | 0.729        | 2.073          | 0.142    | 0.000          | 0.019 | cox(surv + addcovar) | Sex |
| Hepatocellular Carcinoma | All mice       | 2   | 7.922   | 116811190   | 115944687                   | 118326331      | 2.38                       | 1.516                                 | -1.437       | 0.238          | 0.582    | 0.013          | 0.015 | cox(surv + addcovar) | Sex |
| Pulmonary adenocarcinoma | All mice       | 2   | 6.150   | 106661333   | 105153951                   | 106759991      | 1.60                       | 1.243                                 | 0.721        | 2.056          | 0.169    | 0.000          | 0.012 | cox(surv + addcovar) | Sex |
| Thyroid adenoma          | All mice       | 2   | 9.948   | 120418990.5 | 120256421                   | 123716967      | 3.48                       | 2.212                                 | 2.431        | 11.372         | 0.455    | 0.000          | 0.022 | cox(surv + addcovar) | Sex |
| B-cell Lymphoma          | Unirradiated   | 2   | 6.419   | 152243135   | 1511688481                  | 155646718      | 3.96                       | 4.418                                 | -1.058       | 0.347          | 0.214    | 0.000          | 0.044 | cox(surv + addcovar) | Sex |
| Harderian Tumor          | All mice       | 3   | 5.997   | 23109161    | 19658371                    | 27037878       | 7.36                       | 1.442                                 | 0.965        | 2.624          | 0.182    | 0.000          | 0.014 | cox(surv + addcovar) | Sex |
| Harderian adenocarcinoma | All irradiated | 4   | 6.706   | 15987949    | 15232129                    | 1603035.45     | 1.27                       | NA                                    | NA           | NA             | NA       | NA             | NA    | cox(surv + addcovar) | Sex |
| PreT Lymphoma            | All irradiated | 4   | 7.339   | 82622922    | 82336959.4                  | 8549328        | 3.31                       | 2.396                                 | 1.589        | 7.309          | 0.339    | 0.000          | 0.024 | cox(surv + addcovar) | Sex |
| B-cell Lymphoma          | All mice       | 4   | 7.727   | 149549045.5 | 148766129.5                 | 152809928      | 4.04                       | 1.954                                 | -0.730       | 0.482          | 0.273    | 0.007          | 0.020 | cox(surv + addcovar) | Sex |
| Harderian adenocarcinoma | All mice       | 4   | 6.894   | 16498679    | 15232129                    | 16672937       | 1.44                       | NA                                    | NA           | NA             | NA       | NA             | NA    | cox(surv + addcovar) | Sex |
| PreT Lymphoma            | All mice       | 4   | 6.884   | 82622922    | 81987887.5                  | 86145148.9     | 4.16                       | 1.518                                 | 1.863        | 6.446          | 0.321    | 0.000          | 0.015 | cox(surv + addcovar) | Sex |
| PreT Lymphoma            | Gamma          | 4   | 8.413   | 89196864    | 85649328                    | 90387054.5     | 4.74                       | 5.453                                 | 2.243        | 9.423          | 0.357    | 0.000          | 0.055 | cox(surv + addcovar) | Sex |
| PreT Lymphoma            | Gamma          | 4   | 8.413   | 96173703    | 95289711                    | 98770176       | 3.48                       | 5.453                                 | 2.243        | 9.423          | 0.357    | 0.000          | 0.055 | cox(surv + addcovar) | Sex |
| PreT Lymphoma            | Gamma          | 4   | 8.131   | 82622922    | 82622922                    | 83949860       | 3.33                       | 5.453                                 | 2.243        | 9.423          | 0.357    | 0.000          | 0.055 | cox(surv + addcovar) | Sex |
| Harderian adenocarcinoma | HZE            | 4   | 6.026   | 16498679    | 15232129                    | 16896221       | 1.66                       | NA                                    | NA           | NA             | NA       | NA             | NA    | cox(surv + addcovar) | Sex |
| B-cell Lymphoma          | All mice       | 5   | 8.653   | 31249669.5  | 30911677                    | 31286278       | 0.37                       | 2.148                                 | -0.919       | 0.399          | 0.149    | 0.000          | 0.021 | cox(surv + addcovar) | Sex |
| Harderian Tumor          | All mice       | 5   | 6.283   | 39081520    | 37450602.3875               | 41615415       | 4.16                       | 1.366                                 | 0.932        | 2.539          | 0.183    | 0.000          | 0.014 | cox(surv + addcovar) | Sex |
| Pulmonary adenocarcinoma | All mice       | 5   | 6.219   | 38483317    | 37535263                    | 40555253       | 3.02                       | 1.216                                 | 1.029        | 2.798          | 0.226    | 0.000          | 0.012 | cox(surv + addcovar) | Sex |
| PreT Lymphoma            | Gamma          | 5   | 5.819   | 13977662    | 135811213                   | 141699050      | 5.80                       | 4.169                                 | -17.453      | 0.000          | 2363.034 | 0.594          | 0.042 | cox(surv + addcovar) | Sex |
| B-cell Lymphoma          | Unirradiated   | 5   | 6.499   | 31286278    | 30527389.1375               | 31331455.5875  | 0.80                       | 4.328                                 | -1.156       | 0.315          | 0.235    | 0.000          | 0.043 | cox(surv + addcovar) | Sex |
| BLL Lymphoma             | All irradiated | 6   | 6.316   | 116425643   | 115696271.6                 | 119462570      | 3.77                       | 1.995                                 | -18.749      | 0.000          | 4051.944 | 0.996          | 0.020 | cox(surv + addcovar) | Sex |
| Hepatocellular Carcinoma | All irradiated | 6   | 7.055   | 92859721    | 92631195.5                  | 94313082       | 1.50                       | 2.232                                 | -2.294       | 0.101          | 1.004    | 0.022          | 0.023 | cox(surv + addcovar) | Sex |
| Harderian Tumor          | All irradiated | 7   | 6.241   | 112491829   | 109861463                   | 115478241      | 5.62                       | 2.232                                 | -0.808       | 0.446          | 0.208    | 0.000          | 0.022 | cox(surv + addcovar) | Sex |
| Hepatocellular Carcinoma | All irradiated | 7   | 7.482   | 112130962   | 111094852                   | 113719999      | 2.65                       | 2.304                                 | 1.243        | 3.464          | 0.169    | 0.000          | 0.023 | cox(surv + addcovar) | Sex |
| B-cell Lymphoma          | All mice       | 7   | 7.623   | 140480830   | 137126507                   | 14377616.6375  | 6.65                       | 1.617                                 | -0.990       | 0.372          | 0.273    | 0.000          | 0.016 | cox(surv + addcovar) | Sex |
| Harderian adenoma        | All mice       | 7   | 5.833   | 113864569   | 110698131                   | 11613134.7875  | 5.43                       | 1.152                                 | -0.698       | 0.498          | 0.203    | 0.001          | 0.012 | cox(surv + addcovar) | Sex |
| Hepatocellular Carcinoma | All mice       | 7   | 6.079   | 113659296   | 109979745.5                 | 113740999      | 3.76                       | 1.317                                 | 0.828        | 2.289          | 0.198    | 0.000          | 0.013 | cox(surv + addcovar) | Sex |
| B-cell Lymphoma          | Gamma          | 7   | 7.211   | 40246302    | 40078510                    | 40371104       | 0.29                       | 5.793                                 | 2.165        | 8.715          | 0.343    | 0.000          | 0.058 | cox(surv + addcovar) | Sex |
| B-cell Lymphoma          | All irradiated | 8   | 6.081   | 71333049    | 71030886.825                | 73078990       | 2.05                       | 1.963                                 | 0.858        | 2.359          | 0.189    | 0.000          | 0.020 | cox(surv + addcovar) | Sex |
| B-cell Lymphoma          | All mice       | 8   | 7.601   | 72326900    | 70783484.5                  | 74167817.1375  | 3.38                       | 1.719                                 | 0.732        | 2.079          | 0.140    | 0.000          | 0.017 | cox(surv + addcovar) | Sex |
| B-cell Lymphoma          | All irradiated | 9   | 7.452   | 77651694    | 74262311.5                  | 80174106       | 5.91                       | 2.714                                 | -0.993       | 0.371          | 0.185    | 0.000          | 0.027 | cox(surv + addcovar) | Sex |
| DLBCL Lymphoma           | All irradiated | 9   | 5.896   | 61740072    | 60199542                    | 64717962       | 4.52                       | 2.048                                 | -2.144       | 0.117          | 0.722    | 0.003          | 0.020 | cox(surv + addcovar) | Sex |
| Pulmonary adenocarcinoma | All irradiated | 9   | 6.188   | 42454683    | 42218208                    | 43296200.4875  | 1.08                       | 2.140                                 | 0.486        | 1.626          | 0.583    | 0.405          | 0.021 | cox(surv + addcovar) | Sex |
| B-cell Lymphoma          | All mice       | 9   | 13.490  | 77651694    | 74261739.7375               | 80174106       | 5.91                       | 3.157                                 | -1.042       | 0.353          | 0.139    | 0.000          | 0.032 | cox(surv + addcovar) | Sex |
| DLBCL Lymphoma           | All mice       | 9   | 6.954   | 61740072    | 60264034                    | 64288841.9375  | 4.00                       | 1.764                                 | -2.161       | 0.115          | 0.589    | 0.000          | 0.018 | cox(surv + addcovar) | Sex |
| B-cell Lymphoma          | Gamma          | 9   | 7.143   | 77651694    | 74217435.0125               | 81322535       | 7.11                       | 4.804                                 | -1.444       | 0.236          | 0.286    | 0.000          | 0.048 | cox(surv + addcovar) | Sex |
| Harderian adenocarcinoma | HZE            | 9   | 5.902   | 102548277   | 101340795                   | 103625449.9375 | 2.28                       | 3.589                                 | -19.933      | 0.000          | 1878.247 | 0.999          | 0.036 | cox(surv + addcovar) | Sex |
| B-cell Lymphoma          | Unirradiated   | 9   | 7.705   | 77507836    | 74239441                    | 8077875.4625   | 6.54                       | 4.933                                 | 1.174        | 3.235          | 0.212    | 0.000          | 0.049 | cox(surv + addcovar) | Sex |
| Hepatocellular Carcinoma | All irradiated | 10  | 6.296   | 91864700    | 89674477.3375               | 92621230       | 2.95                       | 1.521                                 | 0.924        | 2.519          | 0.216    | 0.000          | 0.015 | cox(surv + addcovar) | Sex |
| Hepatocellular Carcinoma | All mice       | 10  | 5.947   | 92621230    | 89176542.5                  | 94876655       | 5.70                       | 1.197                                 | 0.563        | 2.370          | 0.195    | 0.000          | 0.012 | cox(surv + addcovar) | Sex |
| DLBCL Lymphoma           | All irradiated | 11  | 6.701   | 71739994    | 69450261                    | 72909553.0125  | 3.46                       | NA                                    | NA           | NA             | NA       | NA             | NA    | cox(surv + addcovar) | Sex |
| Mammary adenocarcinoma   | All irradiated | 11  | 6.643   | 111349311   | 110681119                   | 113667011      | 2.99                       | 1.995                                 | 19.250       | 229103533      | 5865.572 | 0.997          | 0.020 | cox(surv + addcovar) | Sex |
| B-cell Lymphoma          | All mice       | 11  | 7.736   | 52250226    | 48448172                    | 56039468       | 7.59                       | 1.752                                 | 0.896        | 2.449          | 0.157    | 0.000          | 0.018 | cox(surv + addcovar) | Sex |
| DLBCL Lymphoma           | Gamma          | 11  | 7.512   | 71739994    | 69450261                    | 72907737.5     | 3.46                       | NA                                    | NA           | NA             | NA       | NA             | NA    | cox(surv + addcovar) | Sex |
| B-cell Lymphoma          | Unirradiated   | 11  | 5.894   | 49589121    | 46319591                    | 52250226       | 5.93                       | 3.805                                 | 1.249        | 3.485          | 0.254    | 0.000          | 0.038 | cox(surv + addcovar) | Sex |
| B-cell Lymphoma          | All mice       | 12  | 5.911   | 16742376.5  | 16521324.9125               | 17049168       | 0.53                       | 1.224                                 | -0.626       | 0.535          | 0.152    | 0.000          | 0.012 | cox(surv + addcovar) | Sex |
| Pulmonary adenocarcinoma | All mice       | 12  | 6.745   | 103255981.5 | 102868327.675               | 104913631.9875 | 2.05                       | 1.351                                 | -0.691       | 0.501          | 0.165    | 0.000          | 0.014 | cox(surv + addcovar) | Sex |
| B-cell Lymphoma          | All irradiated | 13  | 6.908   | 111492554   | 110302374                   | 112885502      | 2.58                       | 2.208                                 | 2.024        | 7.568          | 0.587    | 0.001          | 0.022 | cox(surv + addcovar) | Sex |
| B-cell Lymphoma          | All irradiated | 14  | 6.023   | 8604326     | 85612342.5                  | 88761729       | 3.15                       | 1.928                                 | 0.890        | 2.435          | 0.199    | 0.000          | 0.019 | cox(surv + addcovar) | Sex |
| Hepatocellular Carcinoma | All mice       | 14  | 5.902   | 119983205   | 119173497                   | 123365220.35   | 4.19                       | 1.043                                 | 0.722        | 2.059          | 0.168    | 0.000          | 0.010 | cox(surv + addcovar) | Sex |
| Pulmonary adenocarcinoma | All mice       | 14  | 5.913   | 97084001    | 94137982.135                | 99920147       | 5.78                       | 1.502                                 | -0.824       | 0.439          | 0.412    | 0.046          | 0.015 | cox(surv + addcovar) | Sex |
| B-cell Lymphoma          | Gamma          | 14  | 6.750   | 88398605.5  | 85978490.5                  | 90408596       | 4.43                       | 4.215                                 | -1.337       | 0.263          | 0.271    | 0.000          | 0.042 | cox(surv + addcovar) | Sex |
| AML                      | All mice       | 15  | 5.982   | 91001963    | 88406017.6                  | 93620314       | 5.21                       | 1.439                                 | -1.458       | 0.233          | 1.004    | 0.147          | 0.014 | cox(surv + addcovar) | Sex |
| B-cell Lymphoma          | All mice       | 15  | 8.926   | 97593420.5  | 94584056                    | 98932548       | 4.35                       | 2.004                                 | 0.899        | 2.458          | 0.181    | 0.000          | 0.020 | cox(surv + addcovar) | Sex |
| Pulmonary adenocarcinoma | All mice       | 15  | 5.971   | 40283684.5  | 40195208.5                  | 41625318.5     | 1.46                       | 1.388                                 | 1.942        | 6.969          | 0.386    | 0.000          | 0.014 | cox(surv + addcovar) | Sex |
| B-cell Lymphoma          | Unirradiated   | 15  | 7.568   | 98097859    | 96211856.0875               | 9869322.5      | 2.48                       | 4.948                                 | 1.131        | 3.098          | 0.224    | 0.000          | 0.049 | cox(surv + addcovar) | Sex |
| B-cell Lymphoma          | All mice       | 16  | 7.046   | 48588285    | 48224219.5                  | 49493665       | 1.27                       | 1.972                                 | 0.564        | 1              |          |                |       |                      |     |

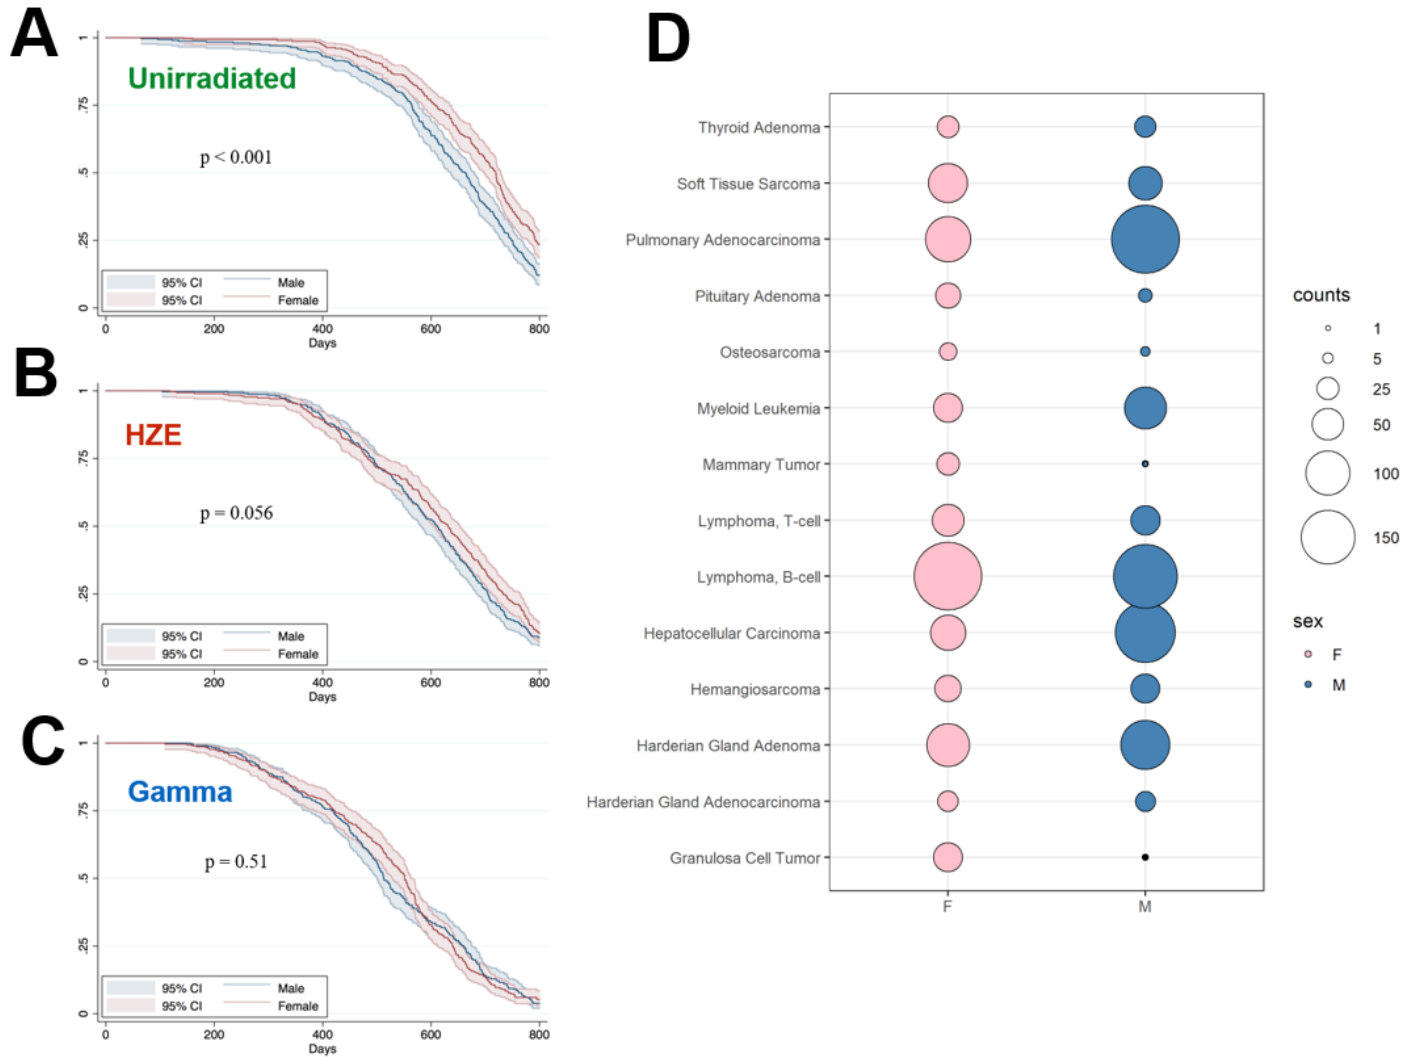

**Fig. S1:** Unirradiated HS/Npt females have significantly increased survival compared to males (A). In contrast, HZE ion irradiated (B) and gamma-irradiation (C) females do not have increased survivals. Distribution of tumor histotypes by sex show the relative incidences of specific tumor histotypes by sex (D).

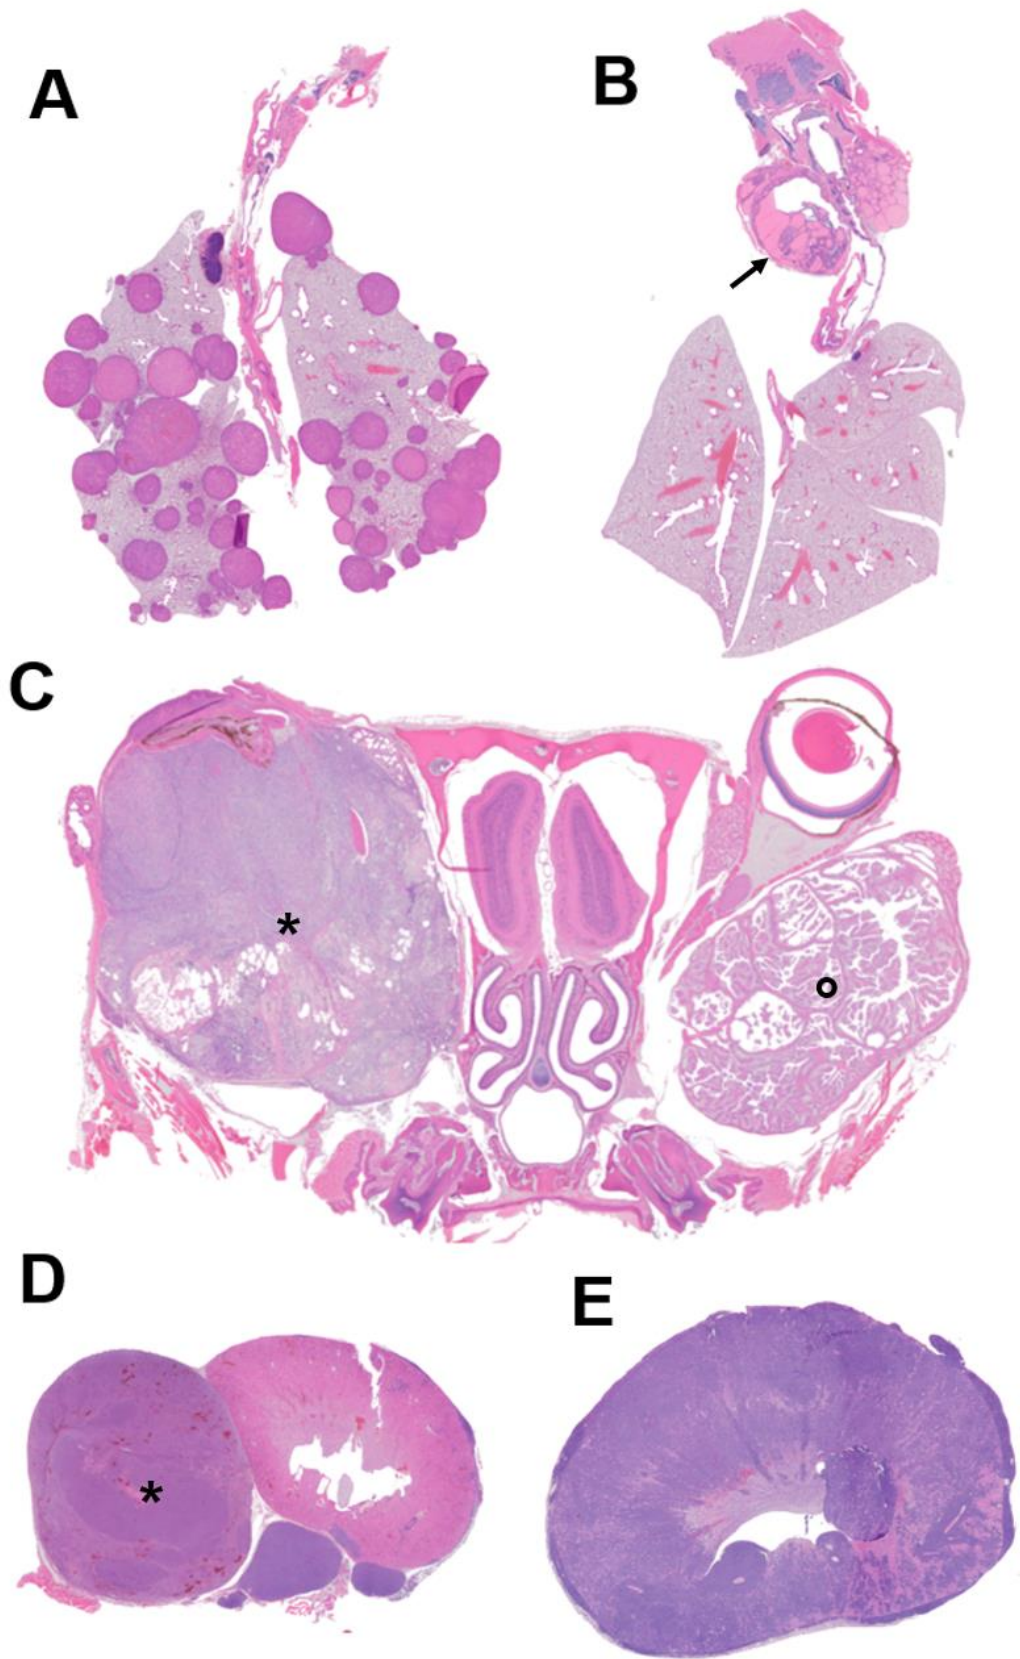

**Fig. S2:** Representative histologic images for pulmonary metastases from a hepatocellular carcinoma (A), thyroid follicular adenoma with numerous dilated follicular structures (arrow) (B), Harderian gland adenocarcinoma (\*) and adenoma (°) (C), adrenal pheochromocytoma (\*) adjacent to kidney (C), neoplastic lymphocytes infiltrate and efface the kidney in a case of renal lymphoma (E).



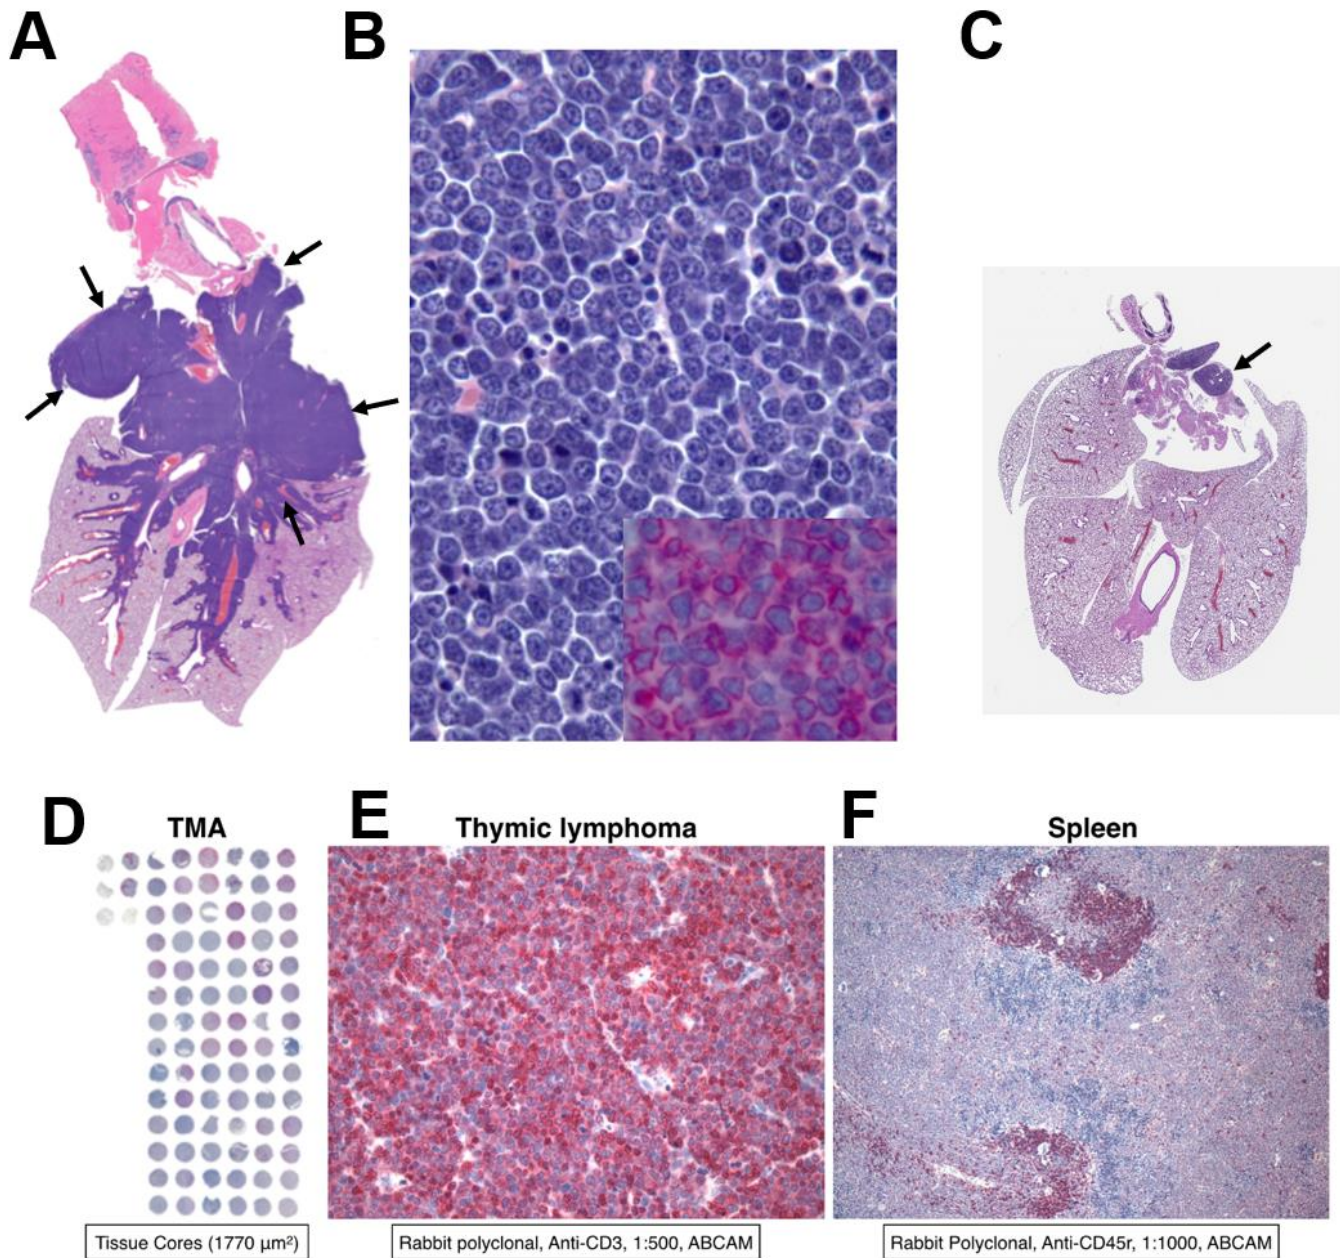

**Fig. S3:** Gross, histologic, and immunohistochemical features of precursor T-cell lymphoblastic lymphoma: a grossly enlarged thymus is present (arrows) with invasion into pulmonary parenchyma (A) and the thymic architecture is effaced by neoplastic lymphocytes that are CD3-positive via immunohistochemistry (inset) (B). For comparison, normal thymus is relatively small (arrow) and localized in the anterior portion of the thoracic cavity (C). Immunophenotyping lymphoid neoplasms was performed using Tissue microarrays (D) and immunohistochemistry for CD3 (E) and CD45R (F). All cases of lymphoma were examined in duplicate.

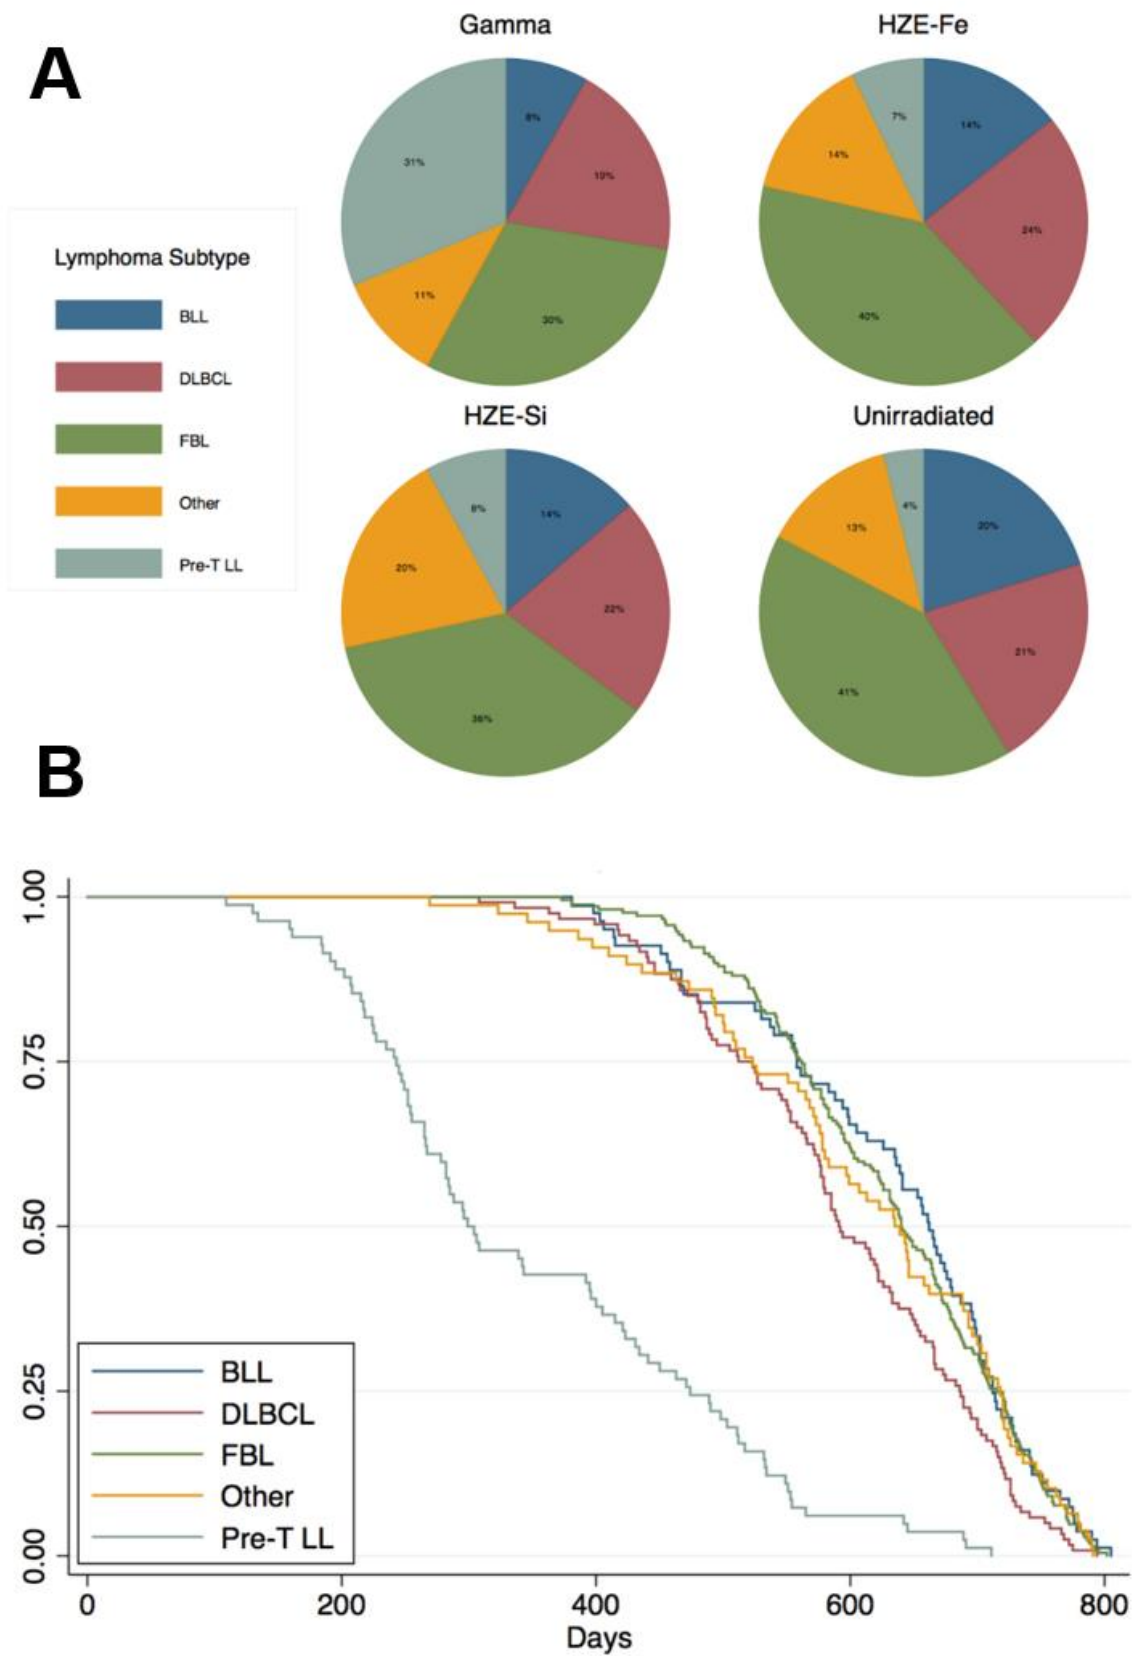

**Fig. S4:** Lymphoma subtype data: A. distribution of lymphoma subtype by treatment group, B. Kaplan-Meier survival for mice diagnosed with each lymphoma subtype, including B-cell lymphoblastic lymphoma (BLL), Diffuse large B-cell lymphoma (DLBCL), follicular B cell lymphoma (FBL), Precursor T cell lymphoblastic lymphoma (PreT LL), and all other observed lymphomas combined.

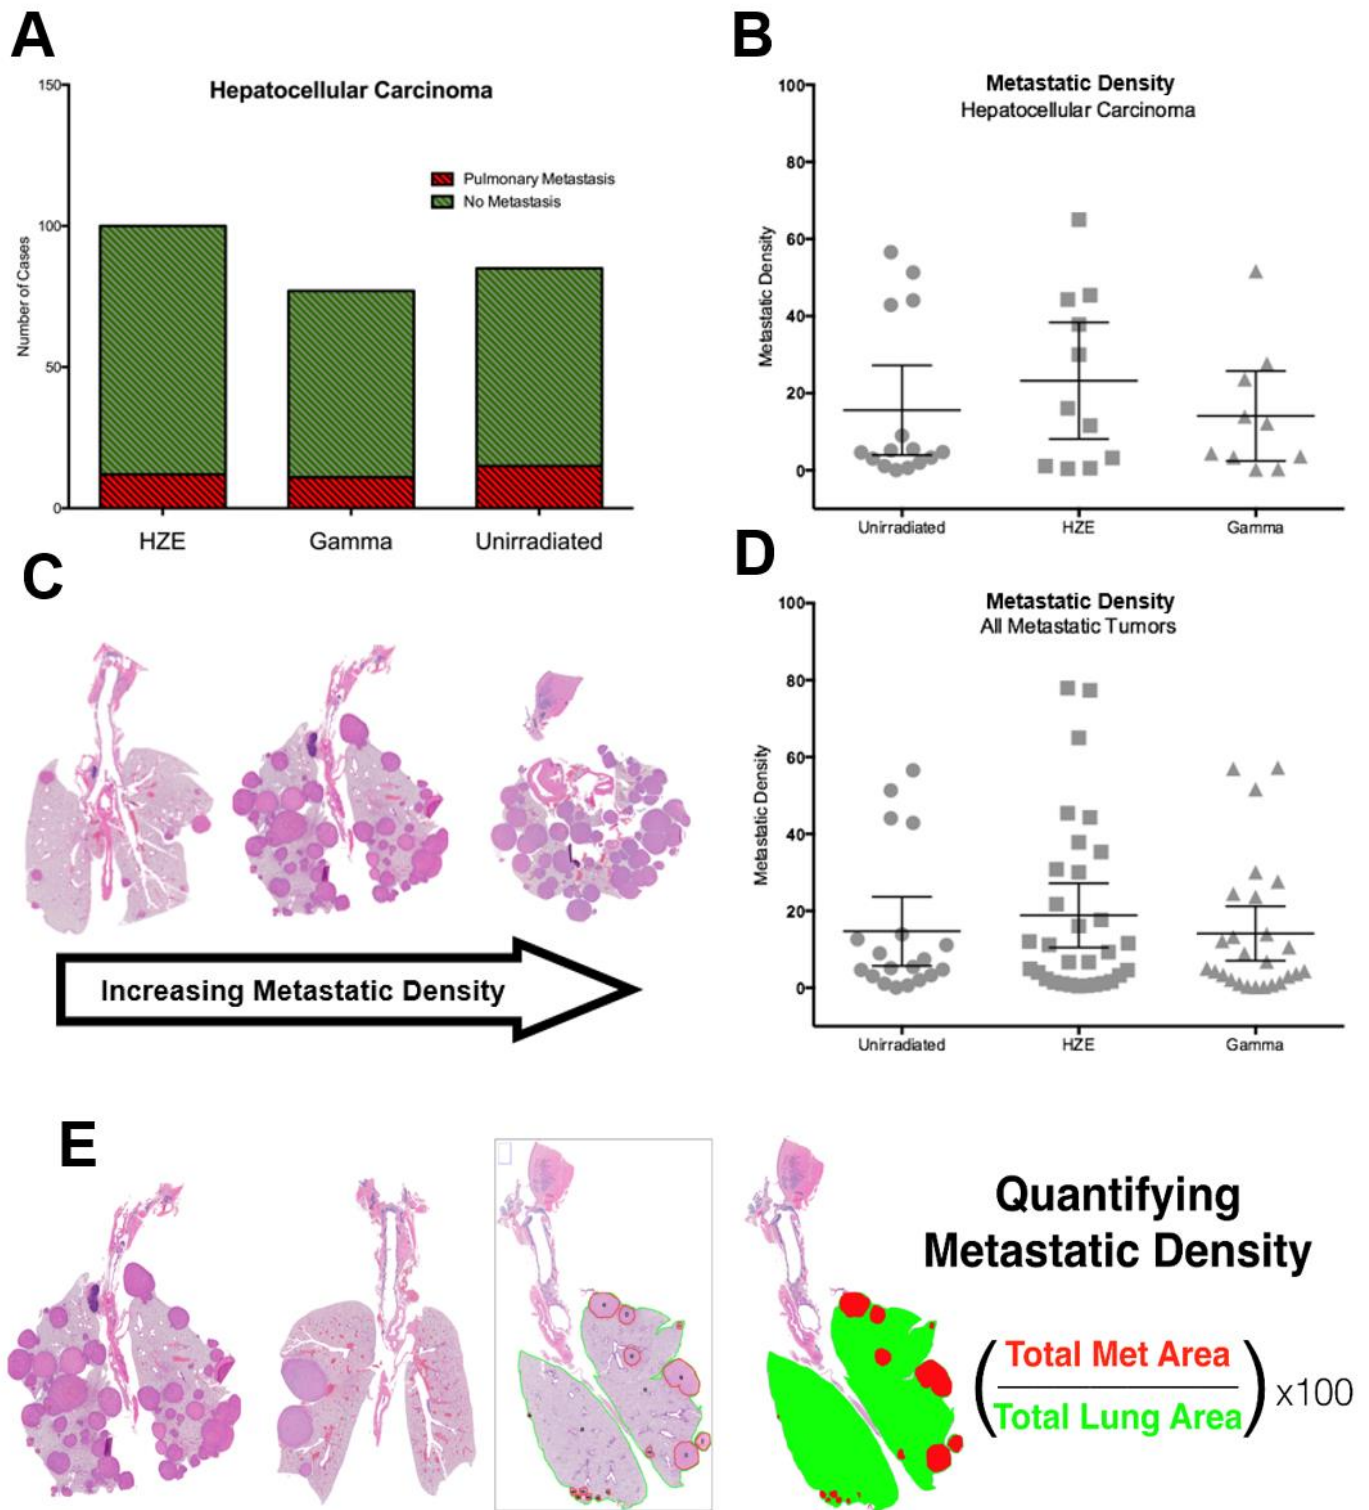

**Fig. S5:** Metastatic characterization: Incidence of metastases in mice diagnosed with hepatocellular carcinoma for each exposure group (HZE, n = 100;  $\gamma$ , n = 66; Unirradiated, n = 85) (A). No significant difference in incidence of metastatic disease was observed in populations bearing hepatocellular carcinomas. Examples of varying in metastatic densities for individual mice with hepatocellular carcinoma (lung, whole slide imaging) (B), Hepatocellular carcinoma metastatic densities for each exposure group (Unirradiated, n = 15; HZE, n = 11;  $\gamma$ , n = 10) (C). Metastatic density for all neoplasms for each exposure group (Unirradiated, n = 19; HZE, n = 28;  $\gamma$ , n = 25) (D). Metastatic densities were highly variable between individual mice. Quantifying metastatic densities was accomplished with whole slide image analysis (E).

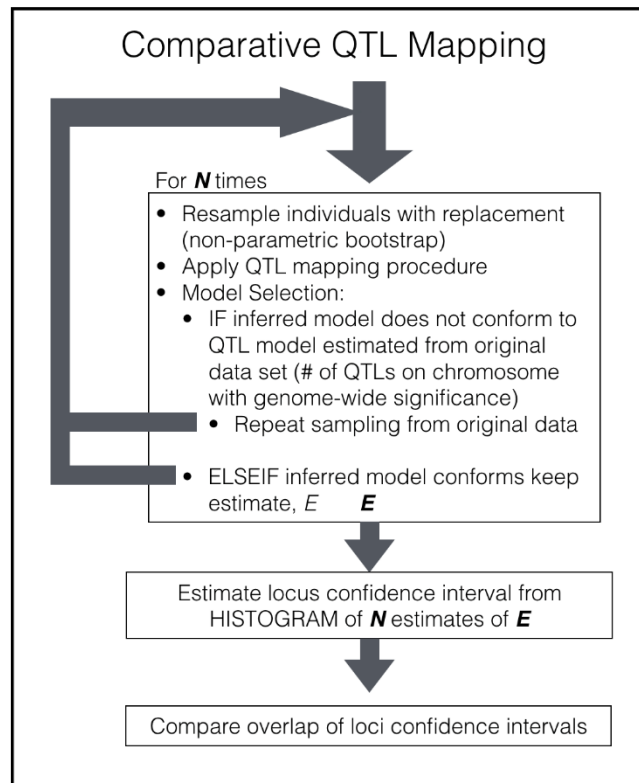

**Fig. S6:** Diagram of a nonparametric resample model averaging procedure for comparative QTL mapping.

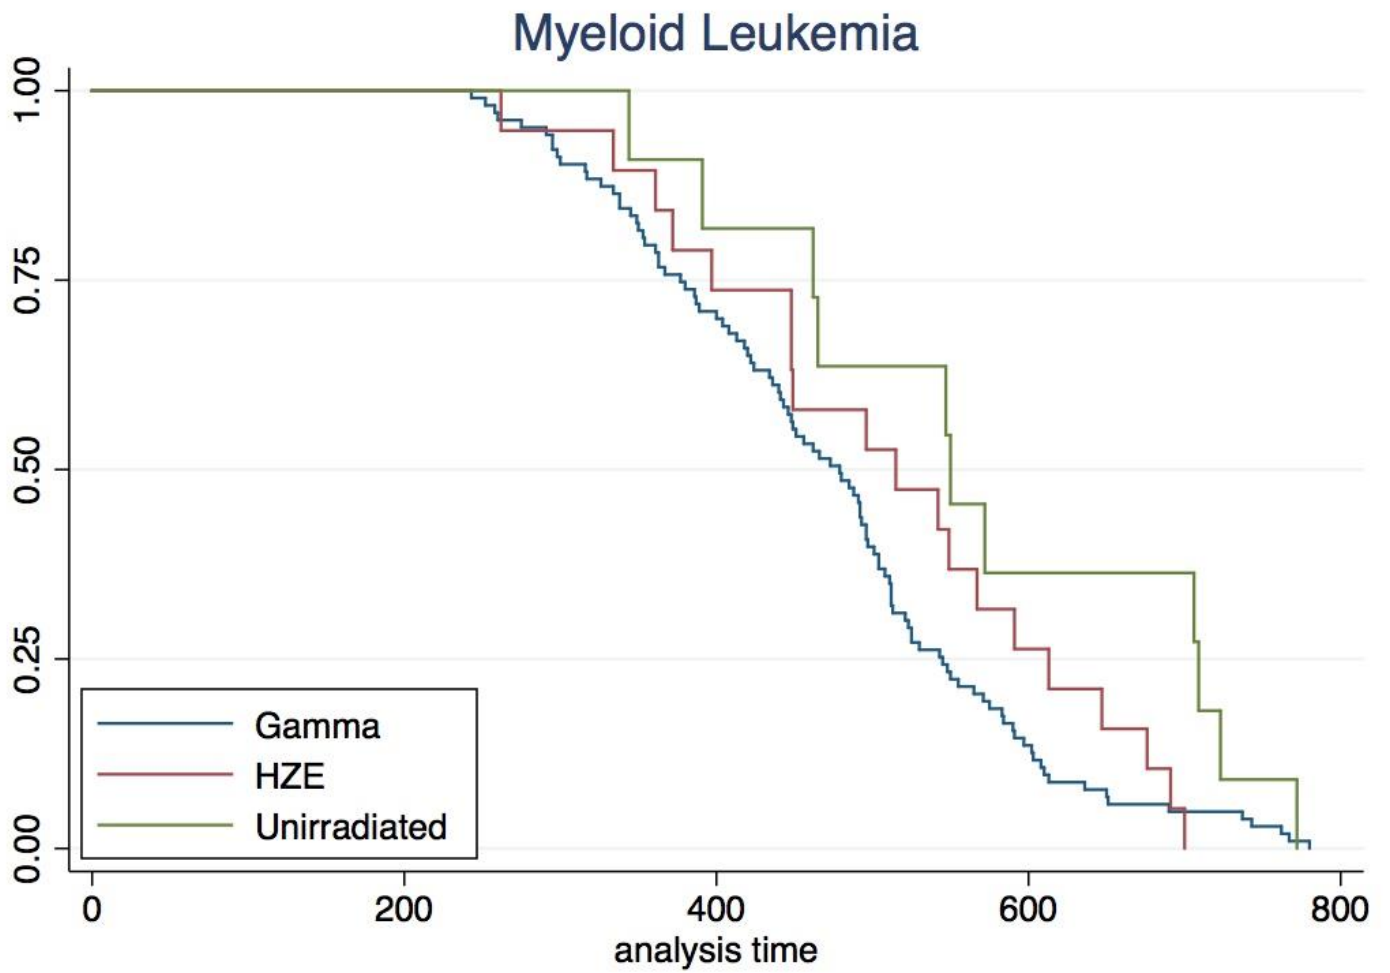

**Fig. S7:** Kaplan-Meier survival estimates for myeloid leukemia by exposure group.

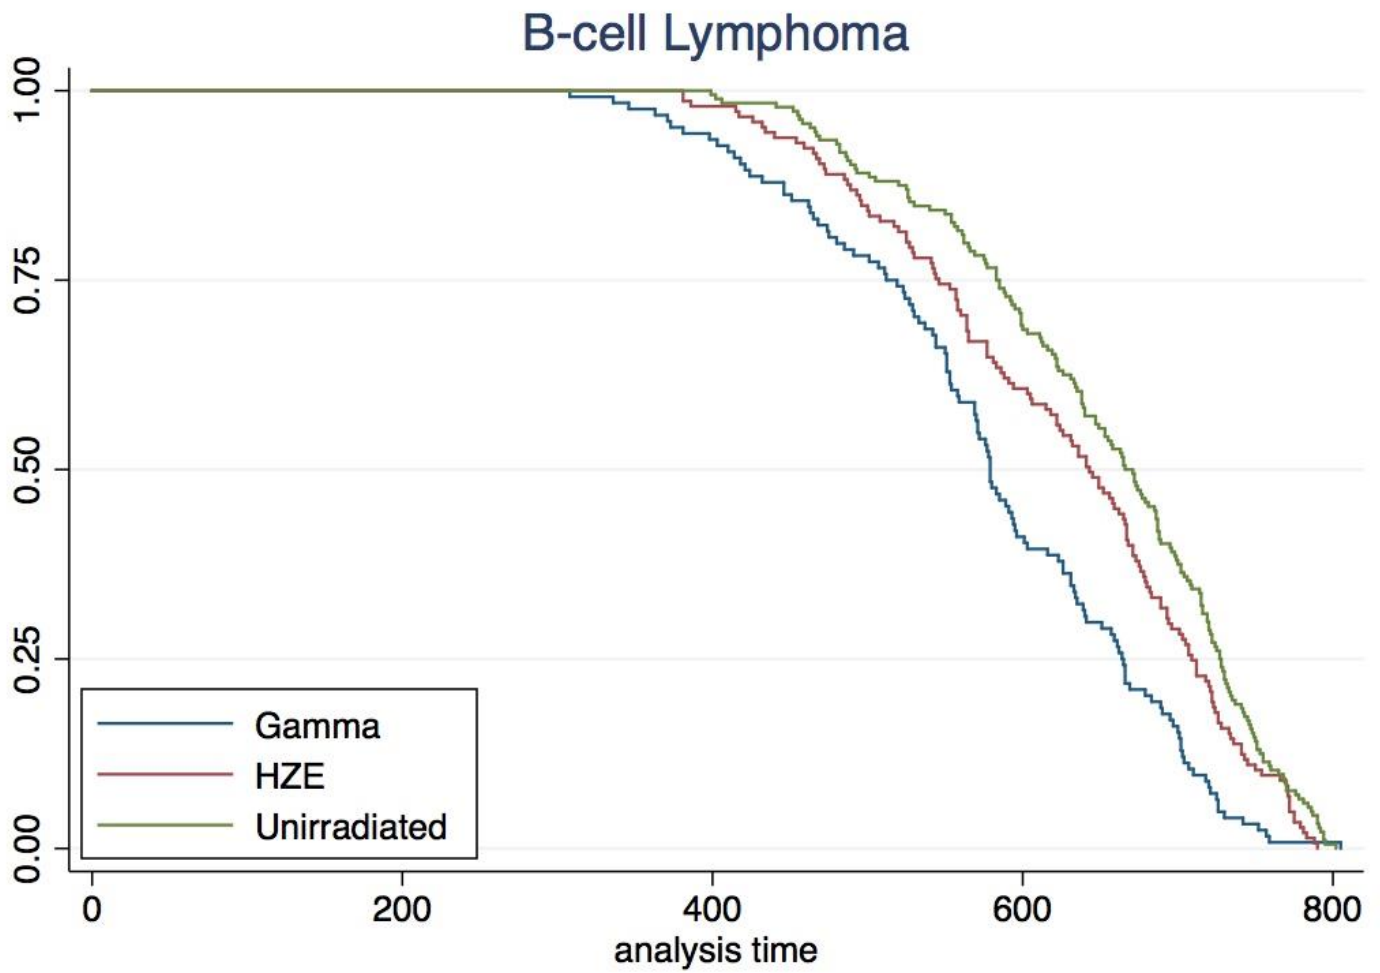

**Fig. S8:** Kaplan-Meier survival estimates for all B-cell lymphoma subtypes by exposure group.

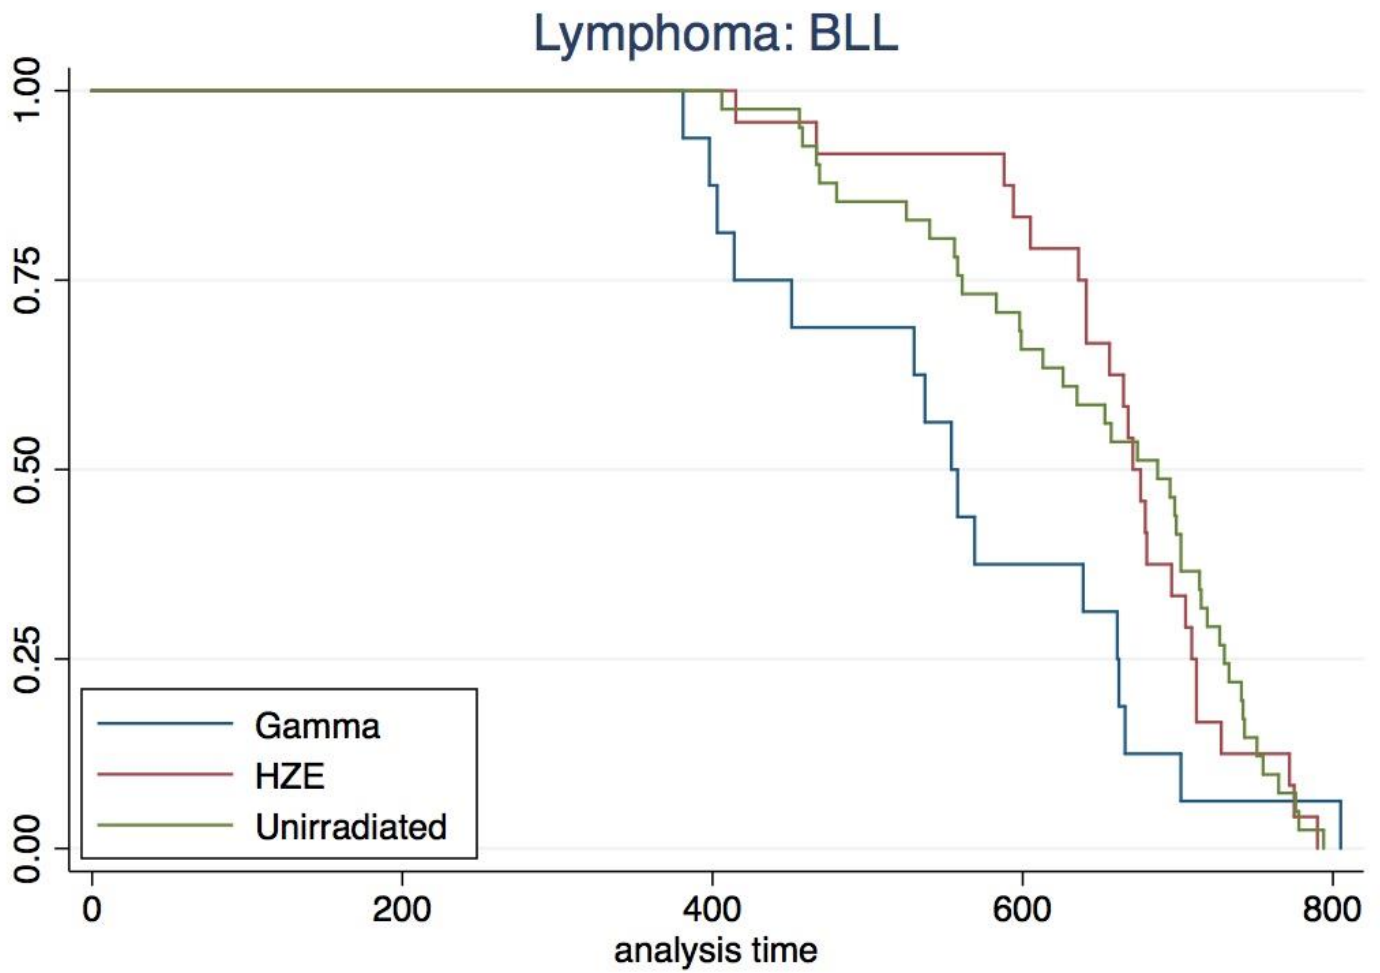

**Fig. S9:** Kaplan-Meier survival estimates for B-cell lymphoblastic lymphoma by exposure group.

# Follicular B-cell Lymphoma

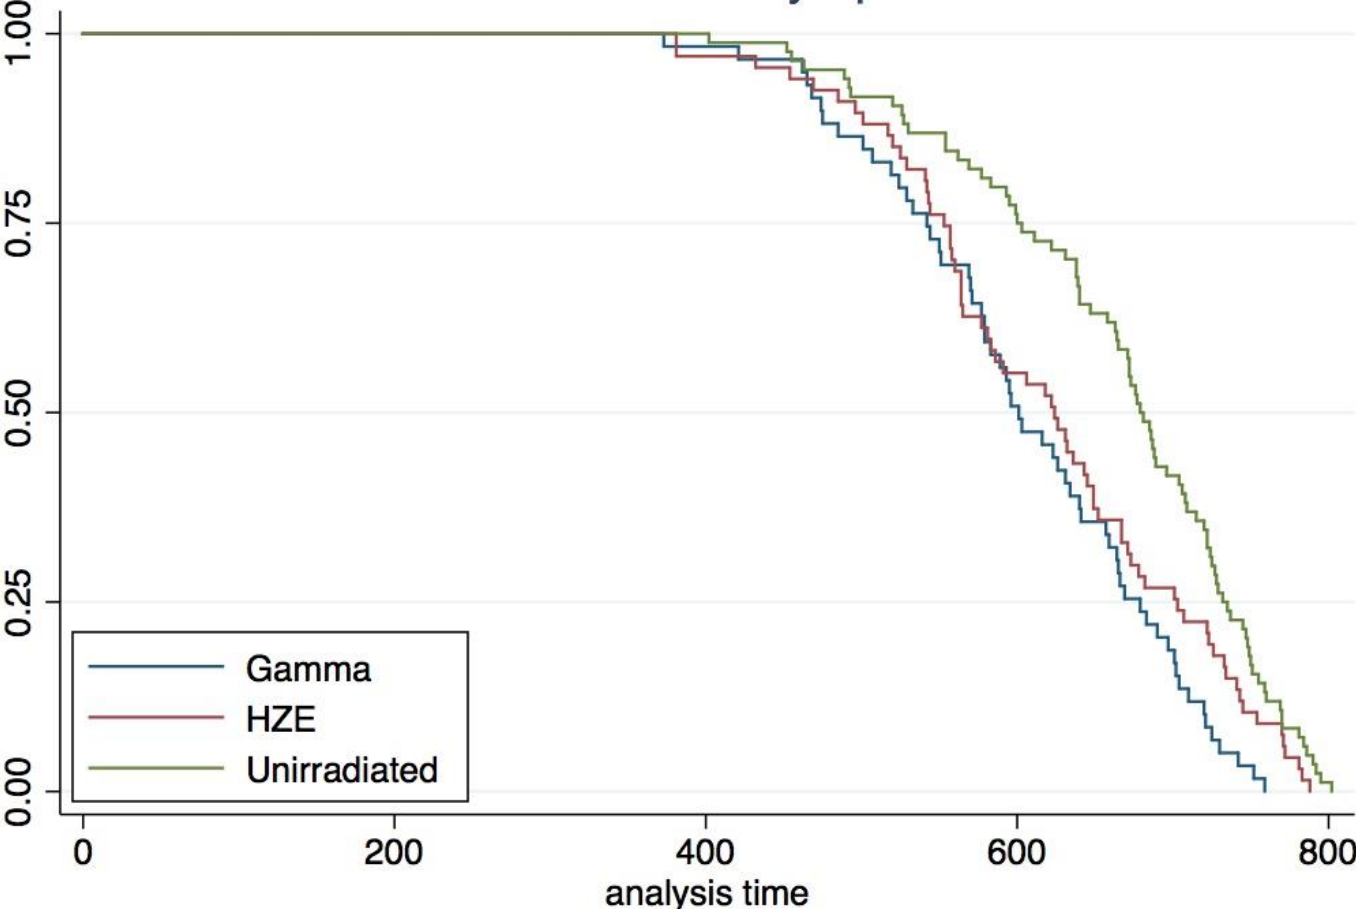

Fig. S10: Kaplan-Meier survival estimates for follicular B-cell lymphoma by exposure group.



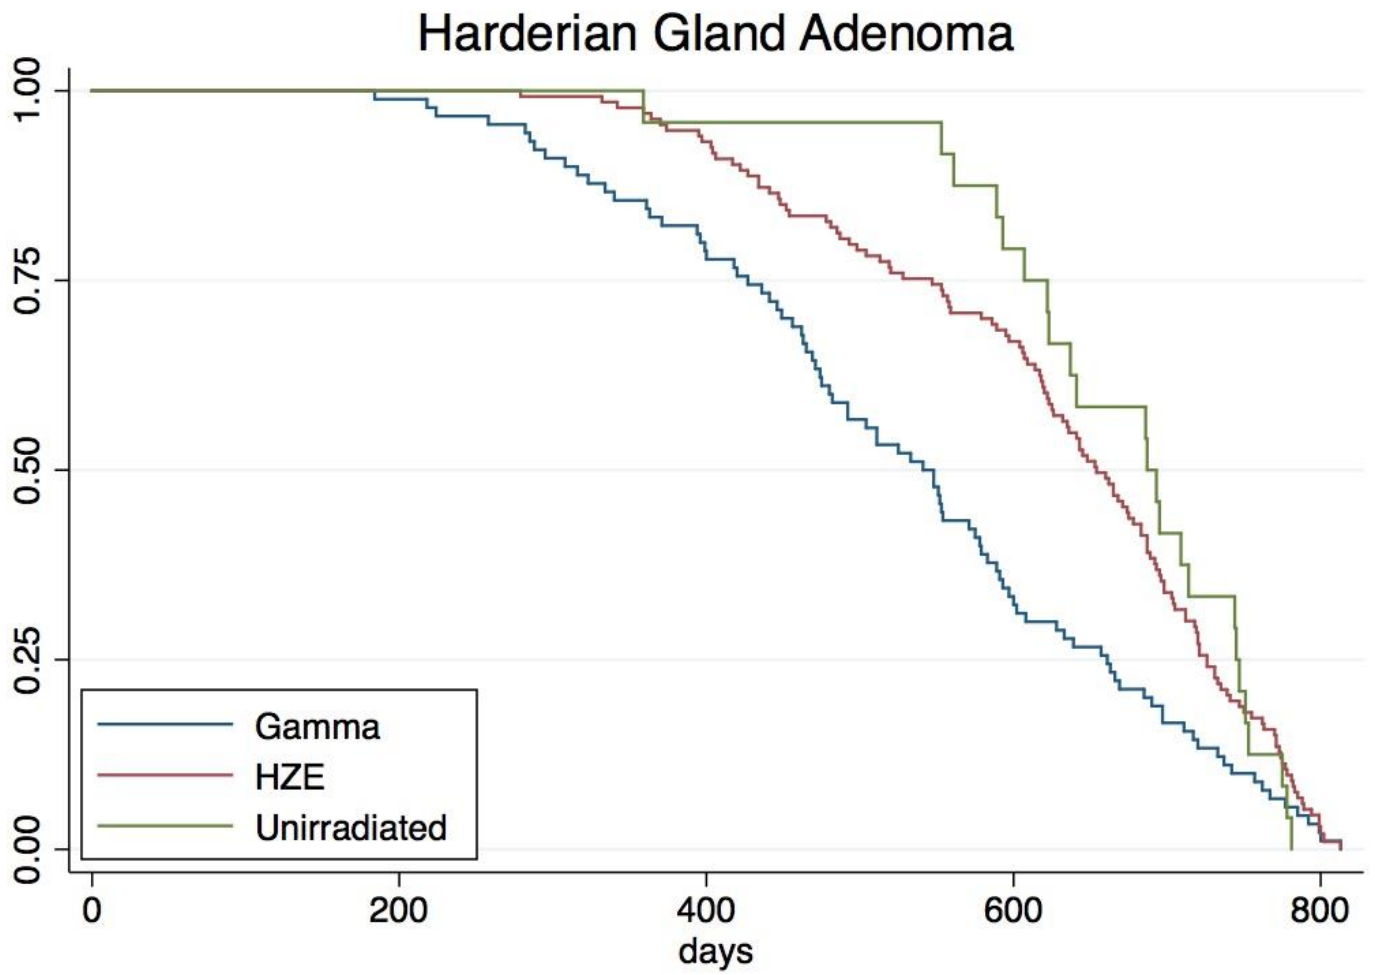

**Fig. S11:** Kaplan-Meier survival estimates for Harderian gland adenoma by exposure group.

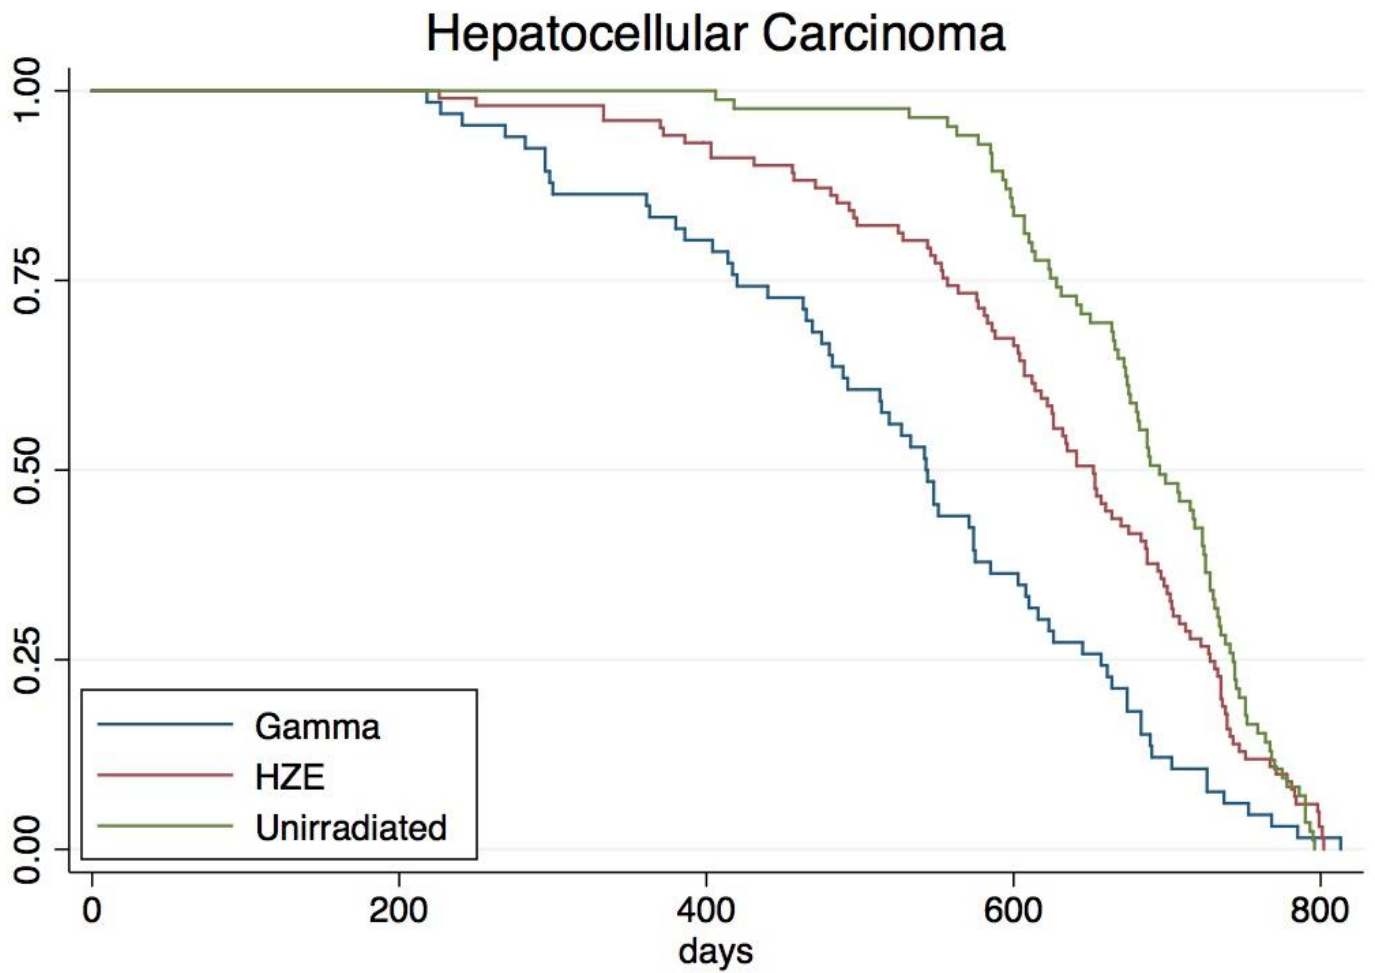

**Fig. S12:** Kaplan-Meier survival estimates for hepatocellular carcinoma by exposure group.

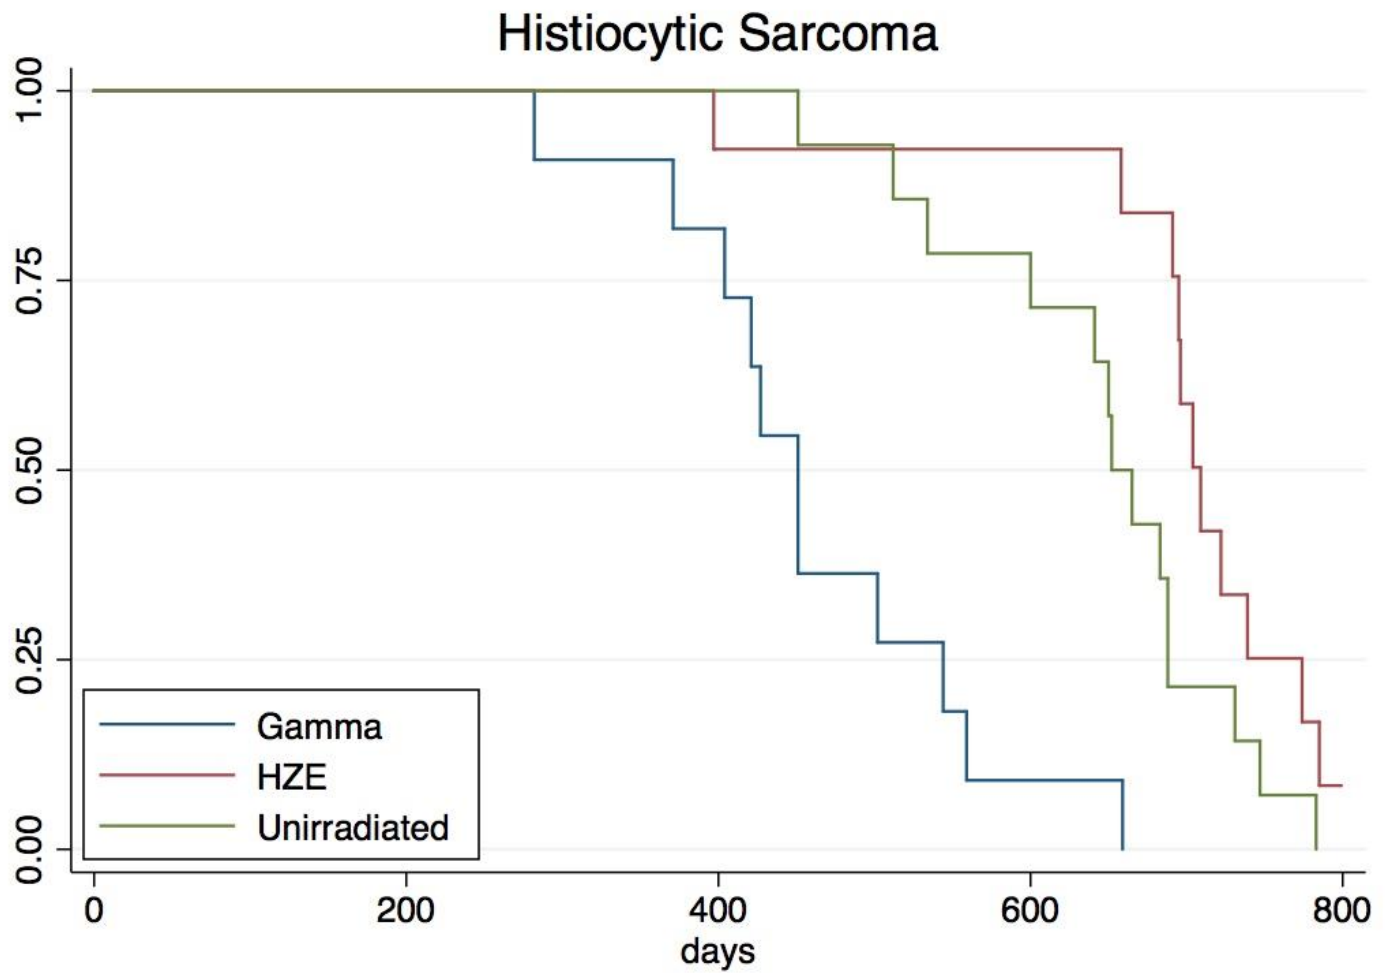

**Fig. S13:** Kaplan-Meier survival estimates for histiocytic sarcoma by exposure group.

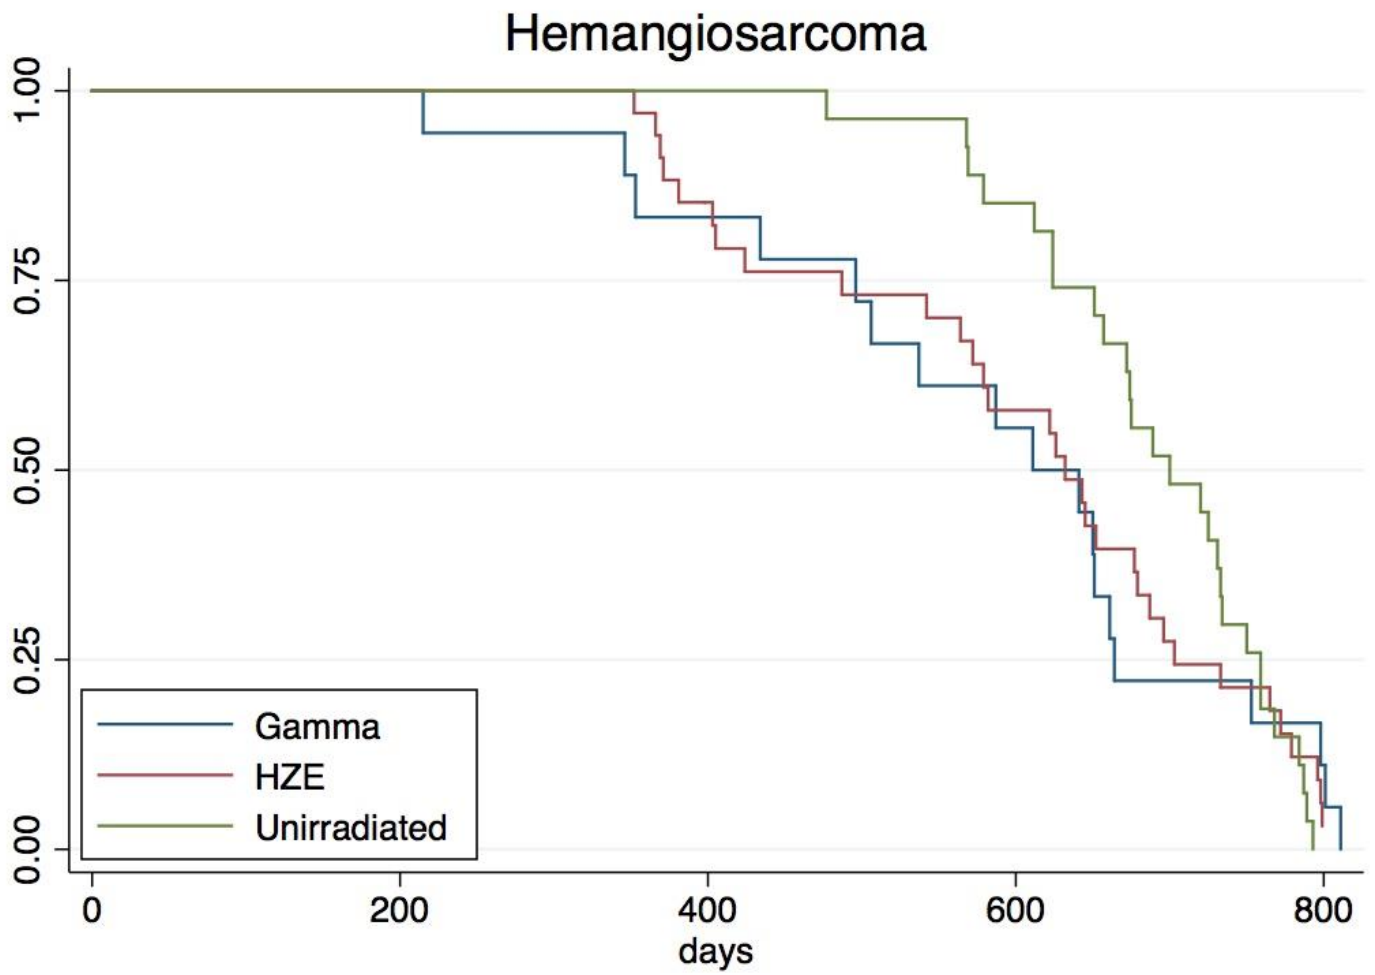

**Fig. S14:** Kaplan-Meier survival estimates for hemangiosarcoma by exposure group.

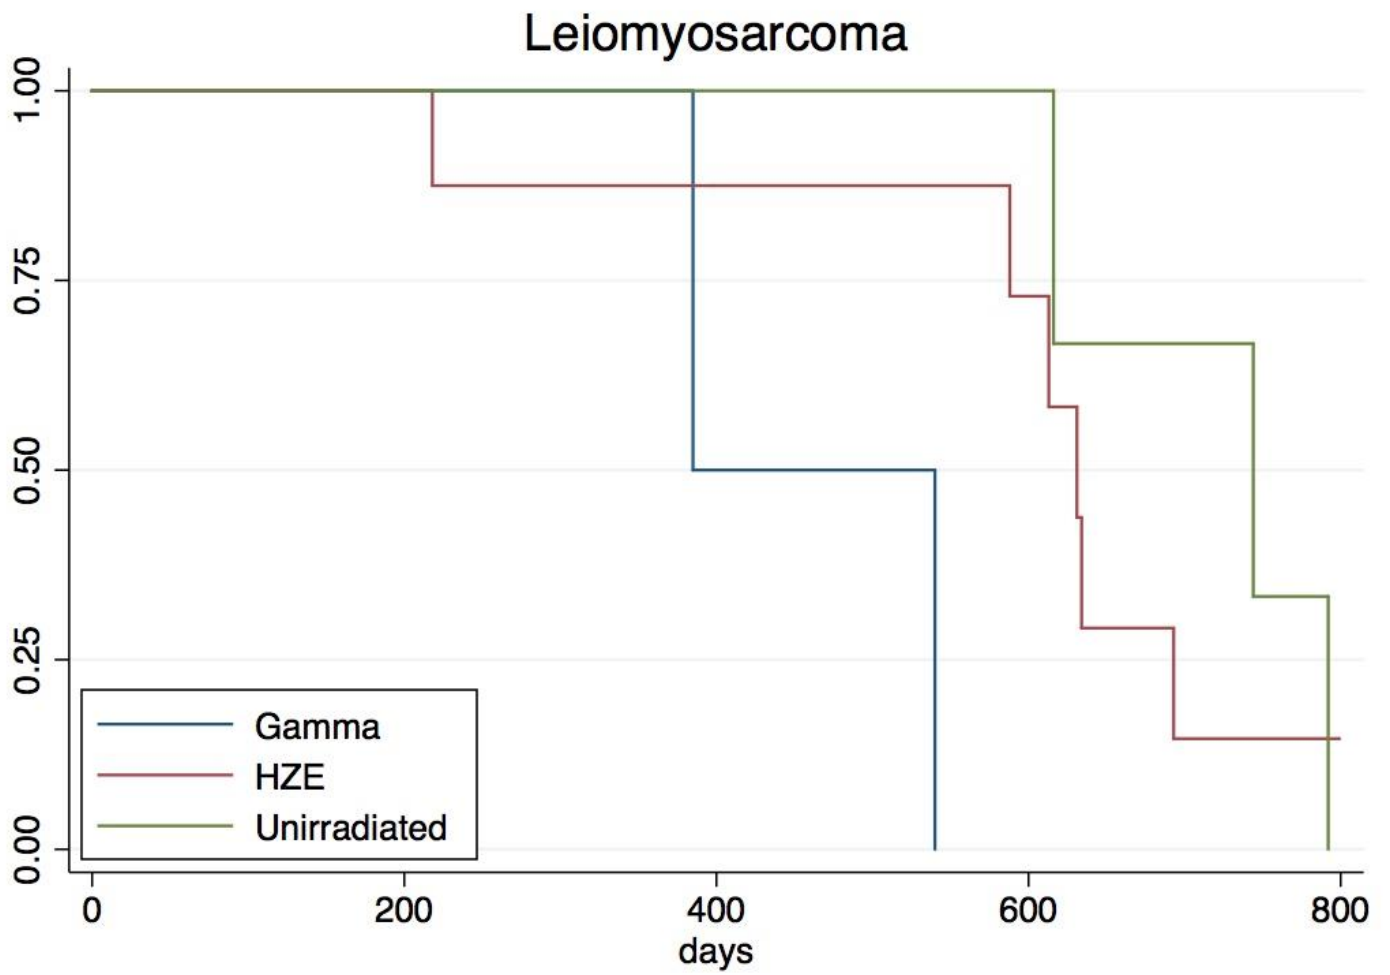

**Fig. S15:** Kaplan-Meier survival estimates for leiomyosarcoma by exposure group.

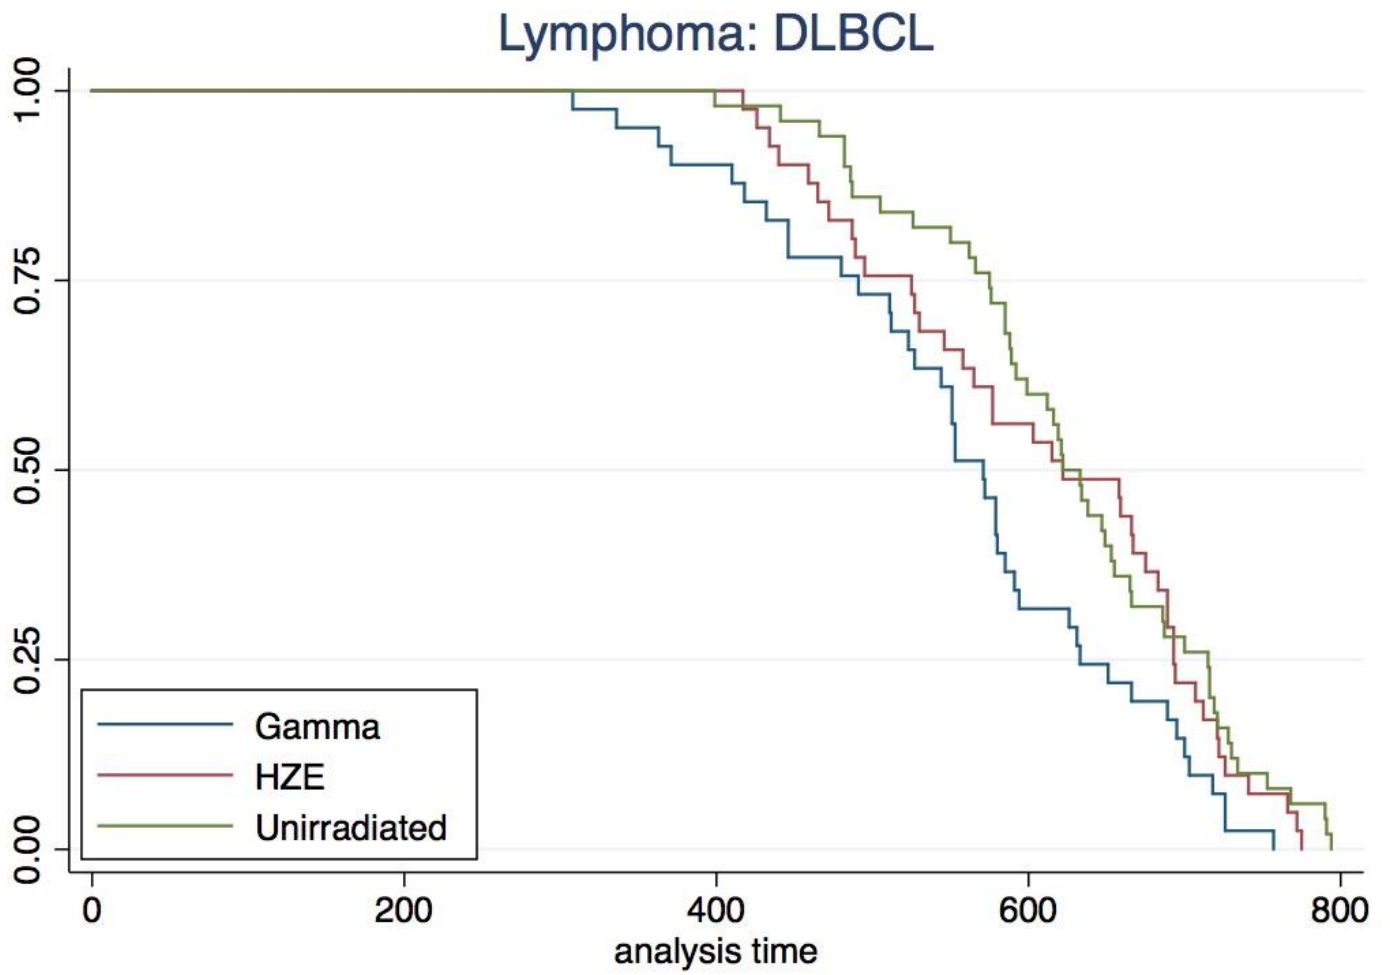

**Fig. S16:** Kaplan-Meier survival estimates for diffuse large B-cell lymphoma by exposure group.

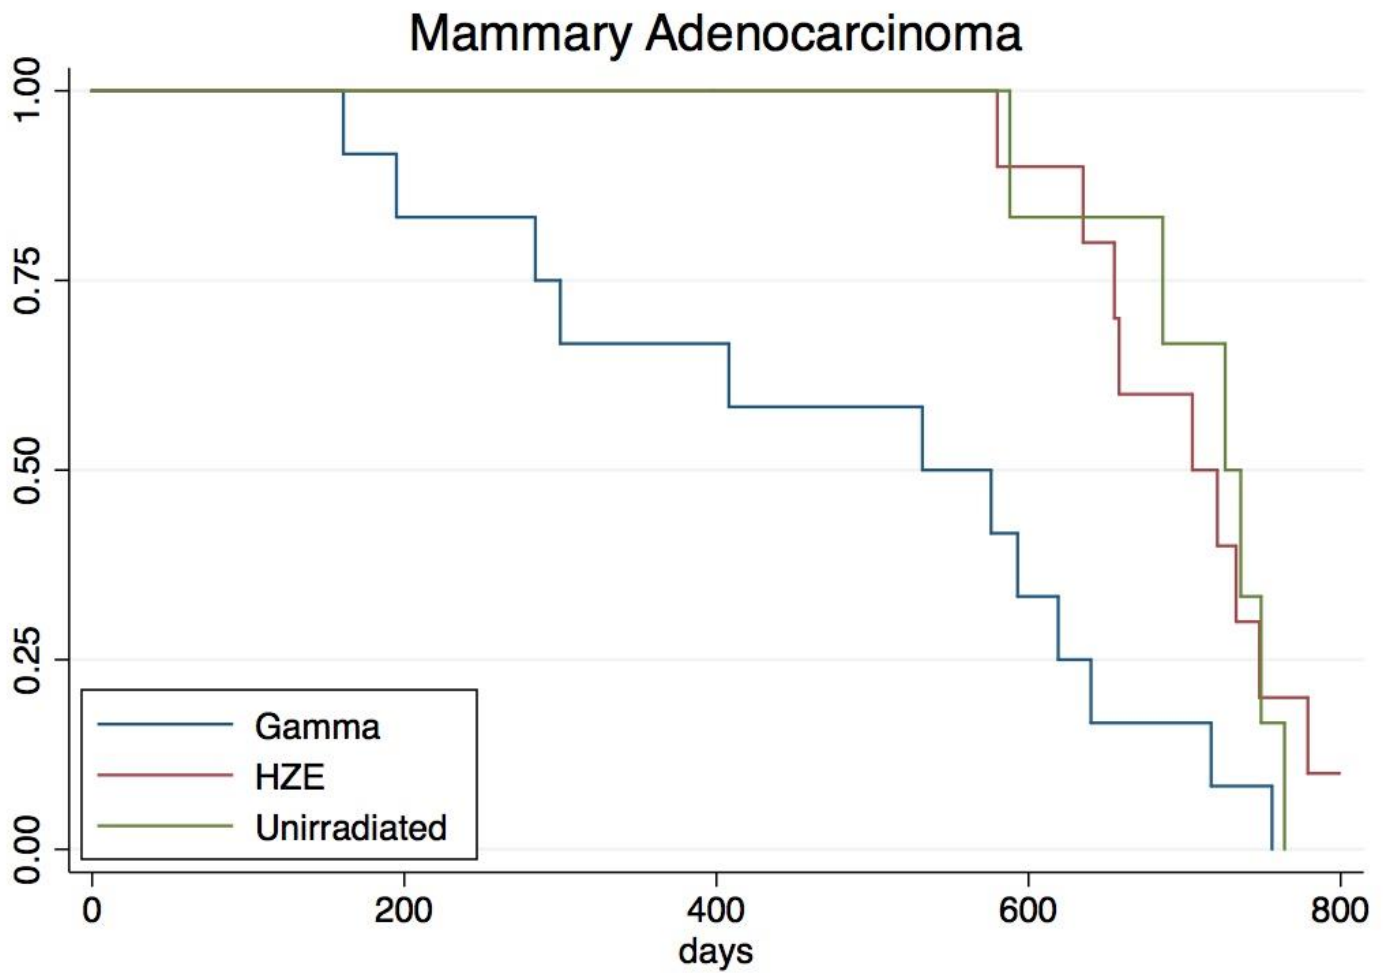

**Fig. S17:** Kaplan-Meier survival estimates for mammary adenocarcinoma by exposure group.

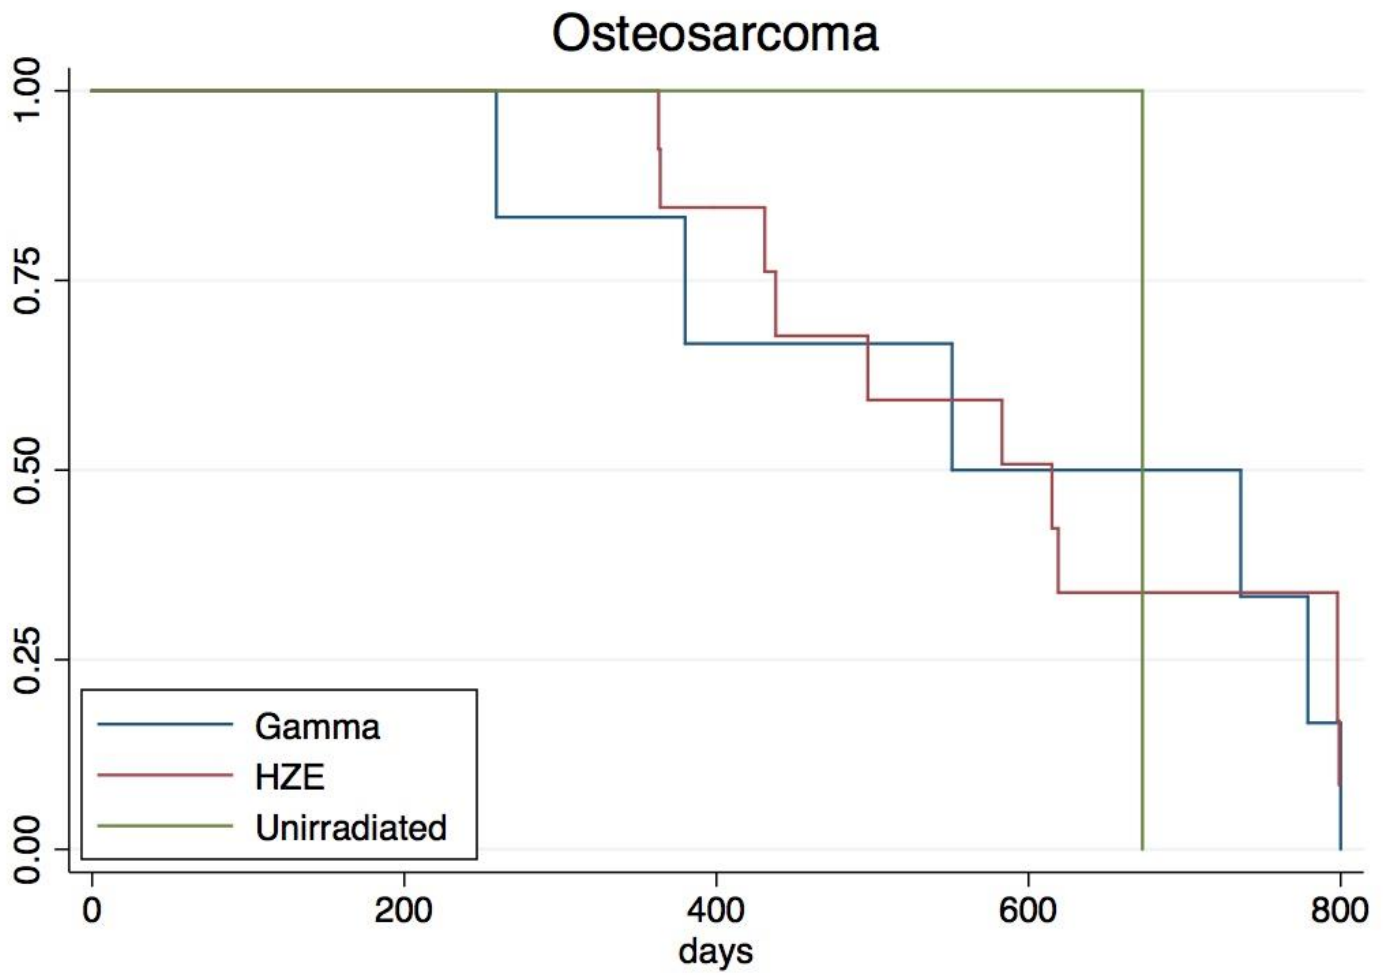

**Fig. S18:** Kaplan-Meier survival estimates for osteosarcoma by exposure group.



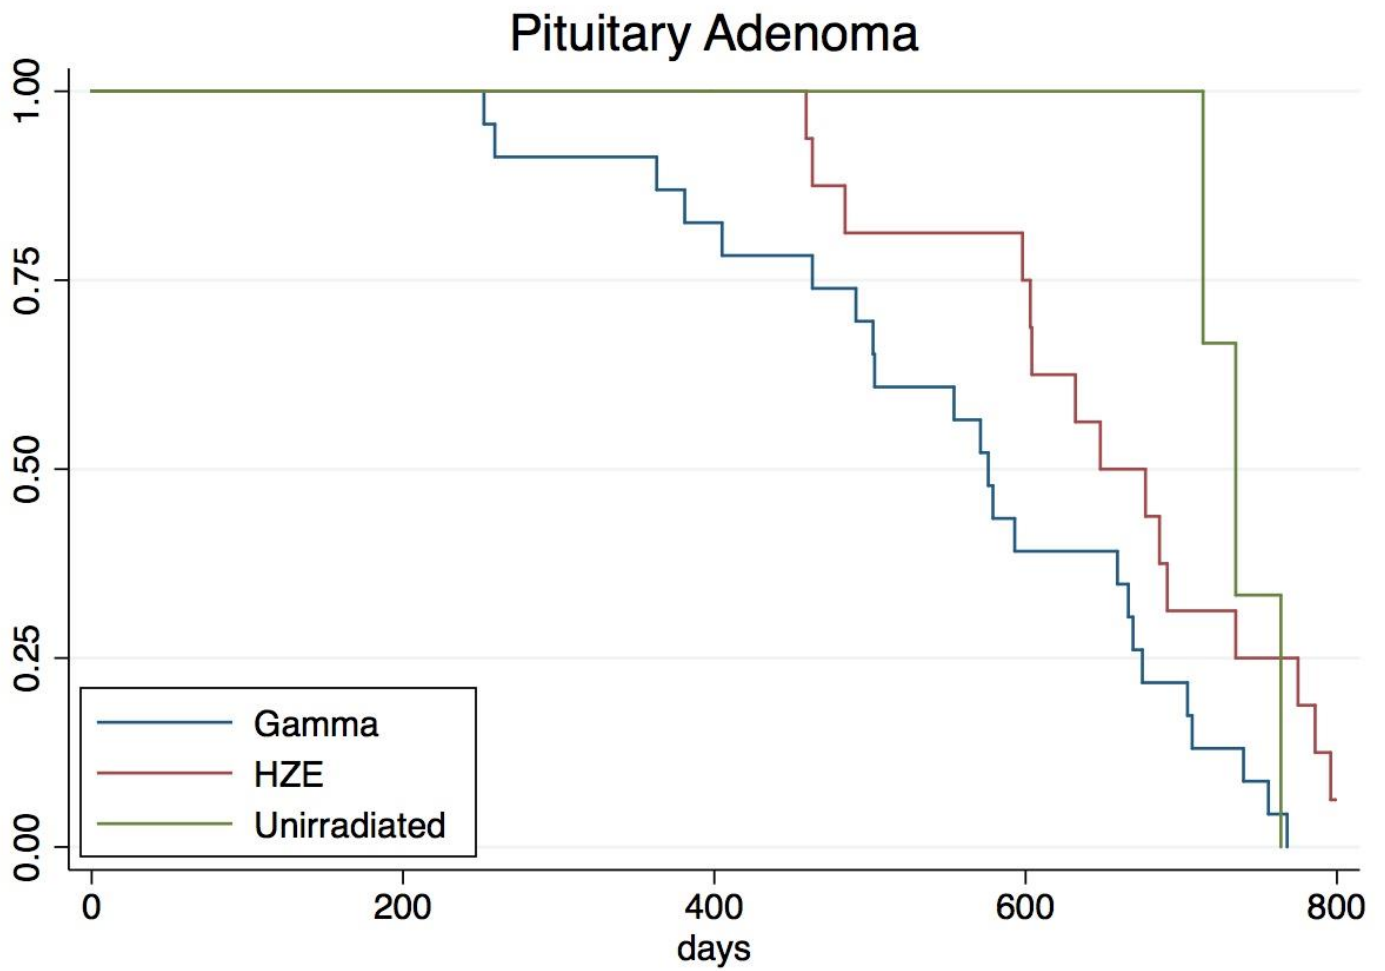

**Fig. S19:** Kaplan-Meier survival estimates for pituitary adenoma by exposure group.

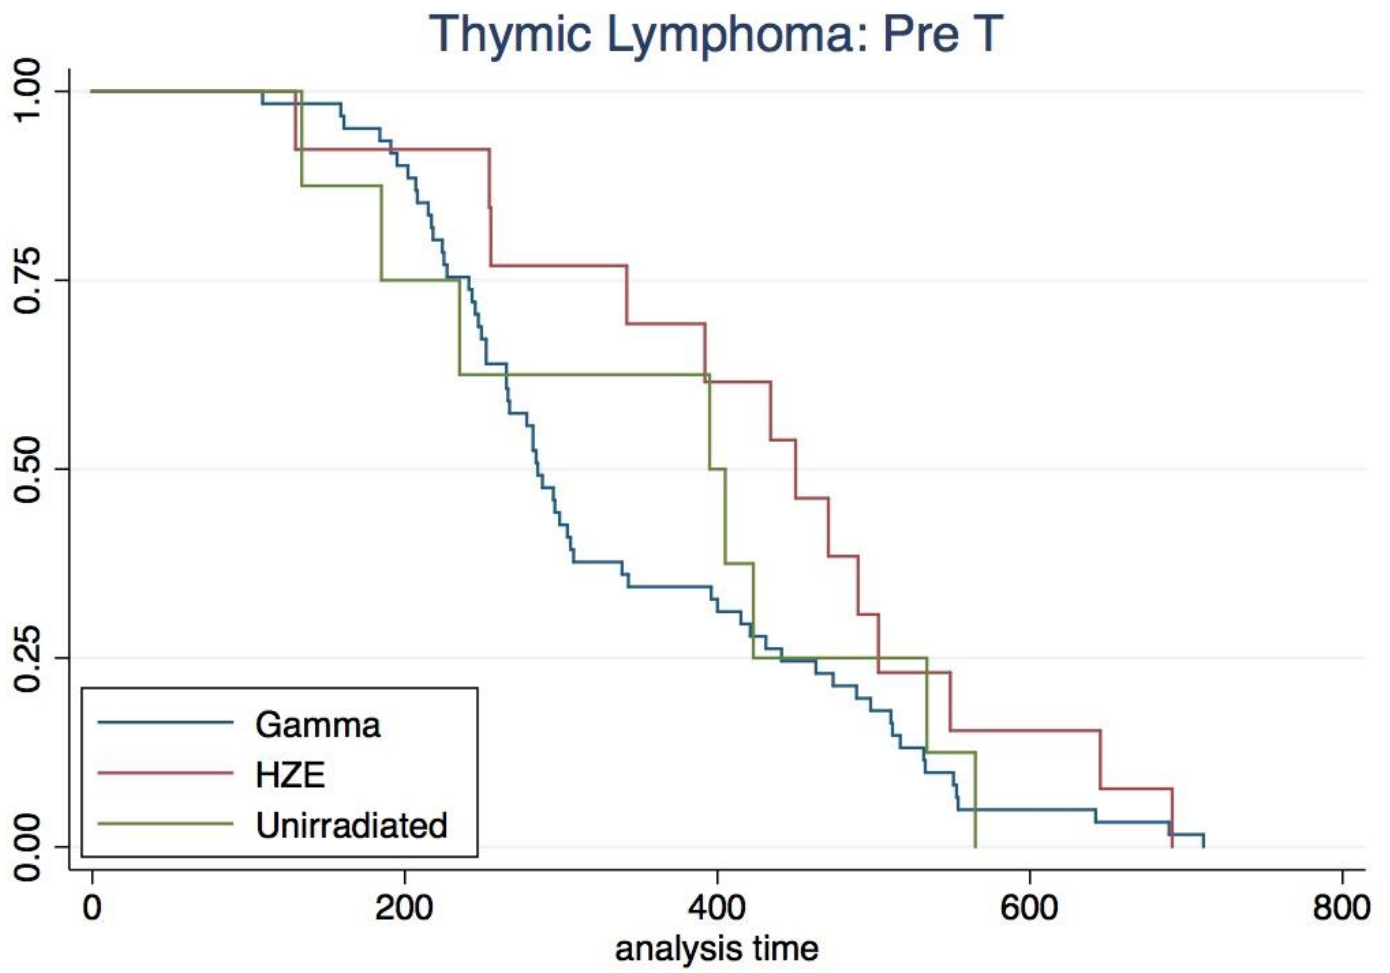

**Fig. S20:** Kaplan-Meier survival estimates for thymic lymphoma (Pre-T lymphoblastic lymphoma) by exposure group.

# Pulmonary Adenocarcinoma

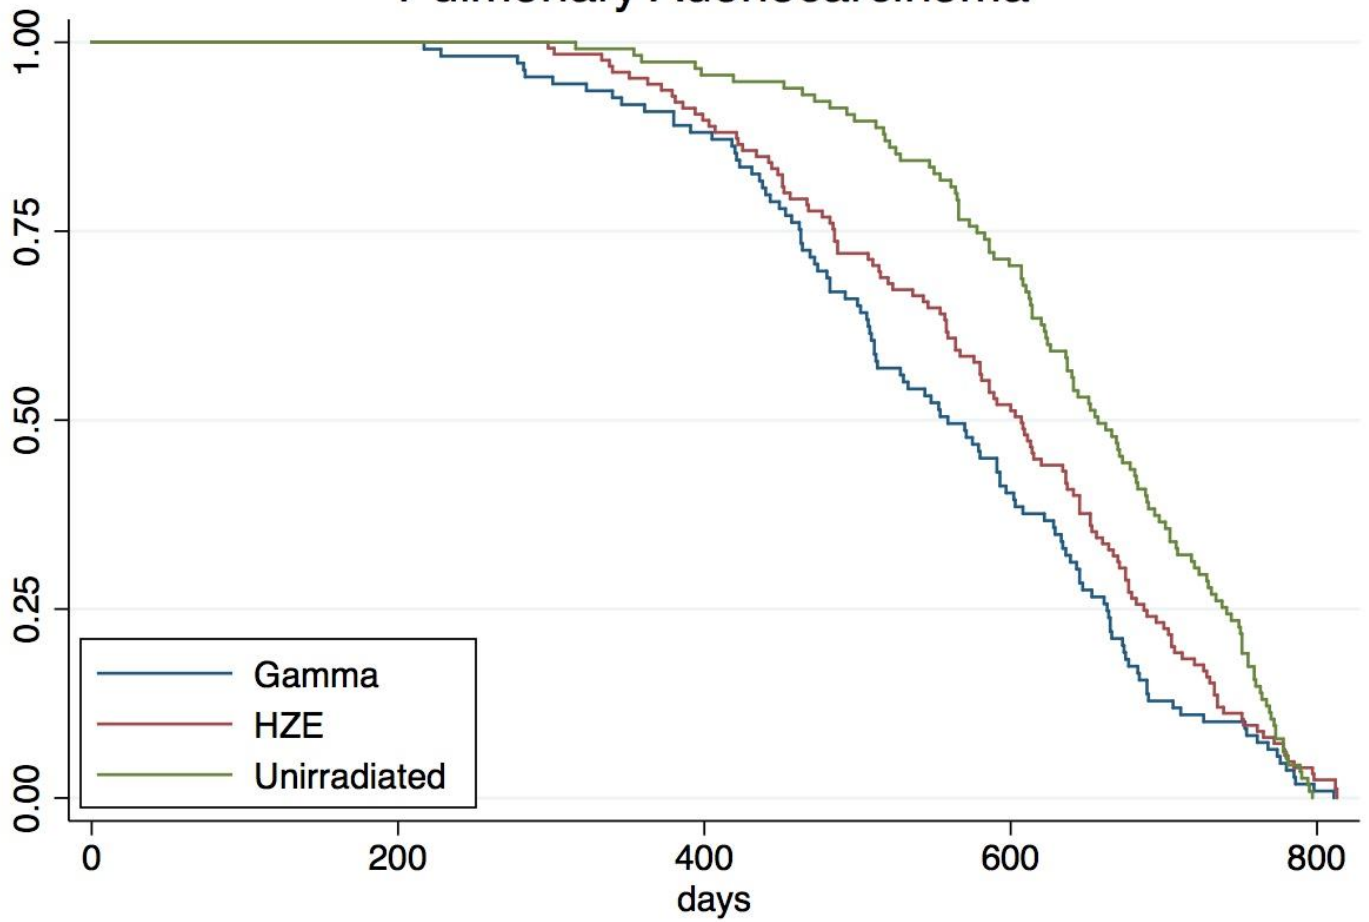

**Fig. S21:** Kaplan-Meier survival estimates for pulmonary adenocarcinoma by exposure group.

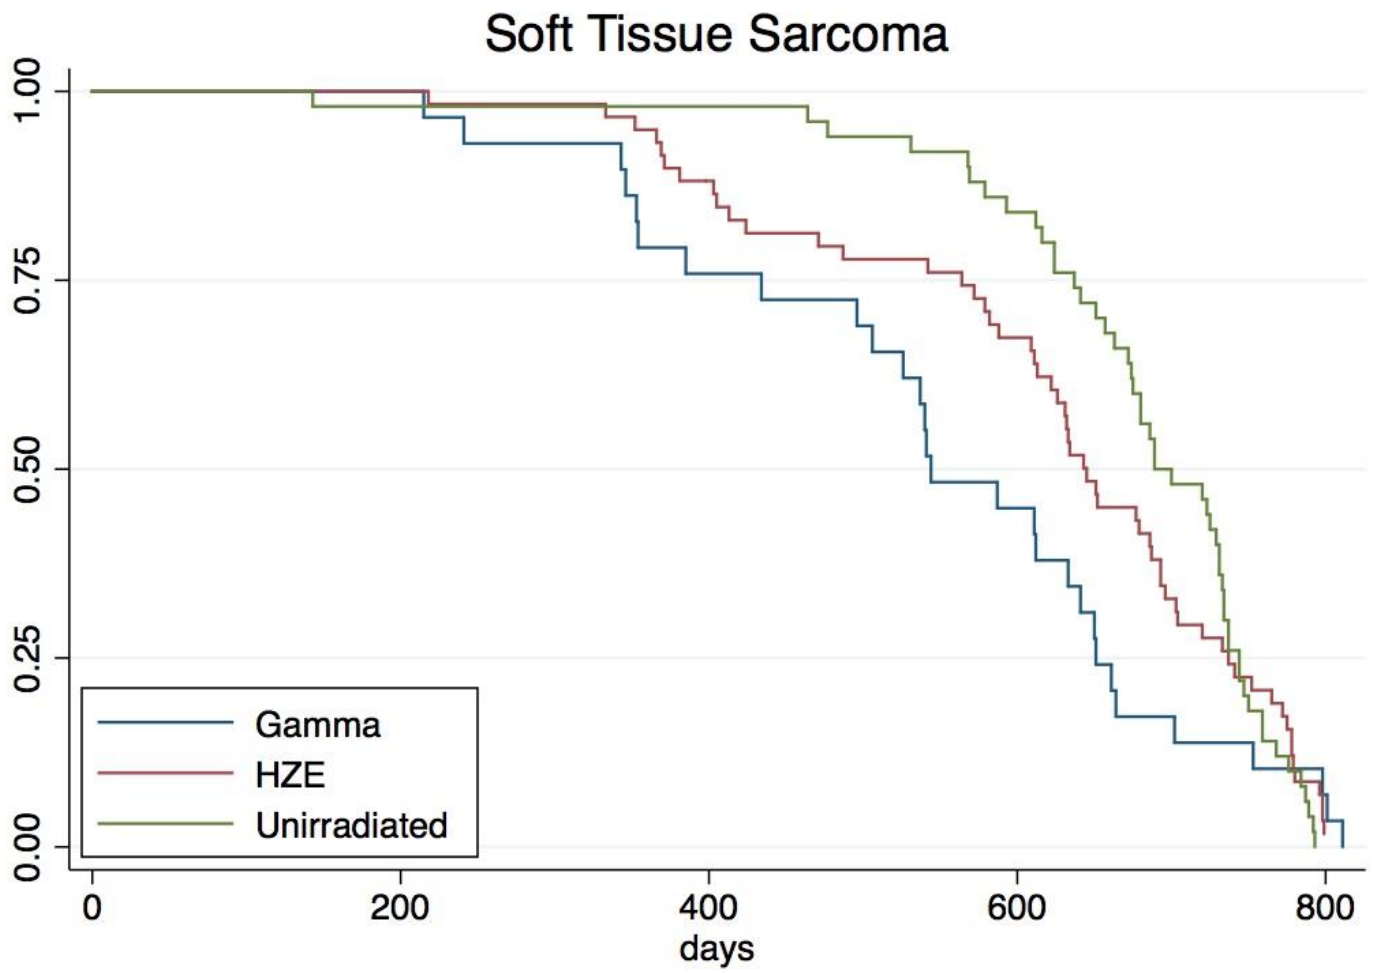

**Fig. S22:** Kaplan-Meier survival estimates for soft tissue sarcoma by exposure group.
